# Supplementary material
Source: PubMed Central journal article supplement (PMC8085160)
Supplement: NIHMS1681478-supplement-Supplemental_Materials.pdf [file NIHMS1681478-supplement-Supplemental_Materials.pdf]

**Supplement Table 1. All responses to the Lyon Advanced Care Planning Survey for adults living with HIV (N=223)**

**Advance Planning and Preparation**

1. Have you ever written down any thoughts about your future health plans?

| %     | #   |                |
|-------|-----|----------------|
| 26.91 | 60  | Yes definitely |
| 4.04  | 9   | Very probable  |
| 7.17  | 16  | Probably       |
| 7.17  | 16  | Probably not   |
| 51.57 | 115 | Definitely not |
| 3.14  | 7   | Do not know    |

2. Advance directives allow people to make their health care choices known before becoming very ill or dying.

a. Have you ever heard about and completed a Health Care Power of Attorney (HCPA), in which you name someone to make decisions about your health care in case you could not?

| %     | #   |                                |
|-------|-----|--------------------------------|
| 24.22 | 54  | Have heard about and completed |
| 61.88 | 138 | Have heard about               |
| 11.66 | 26  | Have not heard about           |
| 2.24  | 5   | Do not know                    |

b. Have you ever heard about and completed an Advance Directive, such as Five Wishes?

| %     | #   |                                    |
|-------|-----|------------------------------------|
| 14.80 | 33  | Have heard about and completed     |
| 47.09 | 105 | Have heard about but not completed |
| 34.08 | 76  | Have not heard about               |
| 4.04  | 9   | Do not know                        |

3. a. Whether you have completed any advance directives/pre-plans or not, have you talked about your wishes for care at end of life with anyone? SELECT ALL THAT APPLY.

| %     | #  |                                                                                                                    |
|-------|----|--------------------------------------------------------------------------------------------------------------------|
| 26.01 | 58 | Spouse/partner                                                                                                     |
| 18.39 | 41 | Parents                                                                                                            |
| 20.18 | 45 | Siblings (brother/sister)                                                                                          |
| 18.39 | 41 | Friends                                                                                                            |
| 5.83  | 13 | Boyfriend/girlfriend                                                                                               |
| 3.14  | 7  | Lawyer                                                                                                             |
| 8.52  | 19 | Primary Physician                                                                                                  |
| 4.48  | 10 | Clergy (such a minister, rabbi, iman, etc.)                                                                        |
| 16.14 | 36 | Other (1 Associates, 1 Aunt, 26 Children, 3 Family Members, 1 Godfather, 3 Nieces and/or Nephews, 1 Social Worker) |
| 35.43 | 79 | Have not talked with anyone                                                                                        |

3.b. Do you have any children?

| %     | #   |                              |
|-------|-----|------------------------------|
| 54.26 | 121 | Yes (proceed to question 3c) |
| 45.74 | 102 | No (proceed to question 4)   |

3.c. If you have children, have you talked about plans for who will take care of your child/children, if you are not able to? SELECT ALL THAT APPLY.

| %     | #  |                                                                                                                                                                                                      |
|-------|----|------------------------------------------------------------------------------------------------------------------------------------------------------------------------------------------------------|
| 5-83  | 13 | Spouse/partner                                                                                                                                                                                       |
| 7-62  | 17 | Parents                                                                                                                                                                                              |
| 5-83  | 13 | Siblings                                                                                                                                                                                             |
| 1-35  | 3  | Friends                                                                                                                                                                                              |
| 0     | 0  | Boyfriend/Girlfriend                                                                                                                                                                                 |
| 0     | 0  | Lawyer                                                                                                                                                                                               |
| 0     | 0  | Primary Physician                                                                                                                                                                                    |
| 0     | 0  | Clergy                                                                                                                                                                                               |
| 27-35 | 61 | Other, please describe (53 Adult Children, 2 Aunt or Aunt and Cousin, 1 Brother-in-Law, 2 Cousin, 2 Daughter, 2 Family, 1 Godmother and Daughter's Father, 1 Grandkids, 1 Grandparents, 2 N/A, 1 No) |

4. If you were ill and knew that you would not get better, who would you want to be involved in decision about your end-of-life care? SELECT ALL THAT APPLY.

| %     | #   |                                                                                                                                                                                                                                    |
|-------|-----|------------------------------------------------------------------------------------------------------------------------------------------------------------------------------------------------------------------------------------|
| 58-30 | 130 | Myself                                                                                                                                                                                                                             |
| 78-03 | 174 | My Family                                                                                                                                                                                                                          |
| 43-95 | 98  | My Doctor                                                                                                                                                                                                                          |
| 34-08 | 76  | Someone else, please specify (5 Children, 19 Friend, 4 Mother, 4 Sibling, 16 Significant Other, 17 Spouse, 10 Surrogate, 1 Fiancé and Godmother, 1 Imam, 1 Niece, 1 Niece and Friend, 1 Pastor/Spiritual Leaders, 1 Social Worker) |

5. When do you think it is the best time to bring up end-of-life decisions?

| %     | #   |                                                                                           |
|-------|-----|-------------------------------------------------------------------------------------------|
| 63-86 | 142 | While healthy                                                                             |
| 7-17  | 16  | When first diagnosed with a life-threatening illness                                      |
| 3-14  | 7   | When first sick from a life-threatening illness                                           |
| 3-59  | 8   | When first hospitalized with a life-threatening illness                                   |
| 0-90  | 2   | If dying                                                                                  |
| 17-49 | 39  | All of the above                                                                          |
| 0-90  | 2   | Never                                                                                     |
| 1-79  | 4   | Do not know                                                                               |
| 1-35  | 3   | Other (1 After coming to terms with life threatening illness, 1 sometime after diagnosis) |

6. Who are the best people/person on the treatment team to bring it up with you? SELECT ALL THAT APPLY.

| %     | #   |                                                                                                                                                                                                                               |
|-------|-----|-------------------------------------------------------------------------------------------------------------------------------------------------------------------------------------------------------------------------------|
| 83-86 | 187 | Physician                                                                                                                                                                                                                     |
| 19-73 | 44  | Nurse Practitioner                                                                                                                                                                                                            |
| 20-63 | 46  | Nurse                                                                                                                                                                                                                         |
| 39-46 | 88  | Social Worker                                                                                                                                                                                                                 |
| 21-08 | 47  | Psychologist                                                                                                                                                                                                                  |
| 25-11 | 56  | Case Manager                                                                                                                                                                                                                  |
| 20-63 | 46  | Chaplain                                                                                                                                                                                                                      |
| 17-49 | 39  | Patient Advocate                                                                                                                                                                                                              |
| 13-90 | 31  | Other (1 Anyone on the treatment team, 1 Brother, 1 Children, 1 Clinical trial staff, 1 Don't know, 9 Family, 1 Family, partner and friends, 2 Friend, 3 Unknown, 5 Significant other, 1 Most knowledgeable about my specific |

health and EOL, 1 Mother, 1 None, 2 Pastor, 1 Psychiatrist,  
3 Surrogate)

7. Do you believe that once you make an important medical decision, for example, to be put on a respirator, a machine that breathes for you, that you would be able to change your mind?

| %                     | #  |                |
|-----------------------|----|----------------|
| 39.64                 | 88 | Yes definitely |
| 11.71                 | 26 | Very probable  |
| 12.61                 | 28 | Probably       |
| 7.21                  | 16 | Probably not   |
| 13.51                 | 30 | Definitely no  |
| 15.32                 | 34 | Do not know    |
| Frequency Missing = 1 |    |                |

8. Do you think your doctor or the hospital will respect your wishes, that is, do what you want about medical care?

| %     | #   |                |
|-------|-----|----------------|
| 69.96 | 156 | Yes definitely |
| 9.87  | 22  | Very probable  |
| 11.66 | 26  | Probably       |
| 2.24  | 5   | Probably not   |
| 2.69  | 6   | Definitely not |
| 3.59  | 8   | Do not know    |

9. Do you think your parent/ guardian/ surrogate understands your wishes?

| %     | #   |                |
|-------|-----|----------------|
| 71.30 | 159 | Yes definitely |
| 10.31 | 23  | Very probable  |
| 8.52  | 19  | Probably       |
| 4.04  | 9   | Probably not   |
| 1.35  | 3   | Definitely no  |
| 4.48  | 10  | Do not know    |

10. Do you think your parent/guardian/surrogate will respect your wishes, that is, do what you want about your medical care?

| %     | #   |                |
|-------|-----|----------------|
| 77.13 | 172 | Yes definitely |
| 8.97  | 20  | Very probable  |
| 9.42  | 21  | Probably       |
| 1.35  | 3   | Probably not   |
| 0.45  | 1   | Definitely no  |
| 2.69  | 6   | Do not know    |

**Thoughts about Death and Dying**

11. How often has death and dying been talked about in your family?

| %     | #  |              |
|-------|----|--------------|
| 10.31 | 23 | Very often   |
| 12.11 | 27 | Often        |
| 37.67 | 84 | Occasionally |
| 26.91 | 60 | Rarely       |
| 12.11 | 27 | Never        |
| 0.90  | 2  | Do not know  |

12. How comfortable are you talking about death?

| %     | #   |                                      |
|-------|-----|--------------------------------------|
| 47.98 | 107 | Very comfortable                     |
| 28.25 | 63  | Somewhat Comfortable                 |
| 9.42  | 21  | Neither comfortable or uncomfortable |
| 7.17  | 16  | Not very comfortable                 |
| 5.83  | 13  | Not at all comfortable               |
| 1.35  | 3   | Do not know                          |

13. How likely are you to...

a. Attend funerals or memorial services when a loved one, friend or a classmate dies

| %     | #   |                            |
|-------|-----|----------------------------|
| 61.43 | 137 | Very likely                |
| 23.32 | 52  | Somewhat likely            |
| 2.69  | 6   | Neither likely or unlikely |
| 4.48  | 10  | Not very likely            |
| 7.62  | 17  | Not at all likely          |
| 0.45  | 1   | Do not know                |

b. Avoid medical checkups because you are afraid the doctor will find "something serious"

| %     | #   |                            |
|-------|-----|----------------------------|
| 3.59  | 8   | Very likely                |
| 3.14  | 7   | Somewhat likely            |
| 4.04  | 9   | Neither likely or unlikely |
| 4.48  | 10  | Not very likely            |
| 81.61 | 182 | Not at all likely          |
| 3.14  | 7   | Do not know                |

c. Speak freely to loved ones about death and dying

| %     | #   |                            |
|-------|-----|----------------------------|
| 48.88 | 109 | Very likely                |
| 30.49 | 68  | Somewhat likely            |
| 3.59  | 8   | Neither likely or unlikely |
| 7.17  | 16  | Not very likely            |
| 8.52  | 19  | Not at all likely          |
| 1.35  | 3   | Do not know                |

d. Visit or telephone a friend or relative who has recently lost a loved one in order to see how they are doing

| %     | #   |                            |
|-------|-----|----------------------------|
| 66.82 | 149 | Very likely                |
| 23.77 | 53  | Somewhat likely            |
| 3.14  | 7   | Neither likely or unlikely |
| 0.90  | 2   | Not very likely            |
| 4.04  | 9   | Not at all likely          |
| 1.35  | 3   | Do not know                |

e. Preplan your own funeral, for example, choose someone to speak or choose the music you would want

| %     | #   |                            |
|-------|-----|----------------------------|
| 48.88 | 109 | Very likely                |
| 20.18 | 45  | Somewhat likely            |
| 5.83  | 13  | Neither likely or unlikely |
| 5.83  | 13  | Not very likely            |
| 14.35 | 32  | Not at all likely          |

4.93      11      Do not know

14. How afraid if at all, are you of...

a. Dying from a long term illness

| %     | #  |                               |
|-------|----|-------------------------------|
| 16.14 | 36 | Very afraid                   |
| 26.01 | 58 | Somewhat afraid               |
| 9.42  | 21 | Neither afraid nor not afraid |
| 6.28  | 14 | Not very afraid               |
| 39.01 | 87 | Not at all afraid             |
| 3.14  | 7  | Do not know                   |

b. Dying suddenly, such as an accident, or being killed

| %     | #   |                               |
|-------|-----|-------------------------------|
| 20.18 | 45  | Very afraid                   |
| 19.28 | 43  | Somewhat afraid               |
| 6.28  | 14  | Neither afraid nor not afraid |
| 5.83  | 13  | Not very afraid               |
| 46.19 | 103 | Not at all afraid             |
| 2.24  | 5   | Do not know                   |

c. Dying alone

| %     | #   |                               |
|-------|-----|-------------------------------|
| 22.42 | 50  | Very afraid                   |
| 19.73 | 44  | Somewhat afraid               |
| 4.93  | 11  | Neither afraid nor not afraid |
| 4.04  | 9   | Not very afraid               |
| 45.29 | 101 | Not at all afraid             |
| 3.59  | 8   | Do not know                   |

d. Dying in an institution such as a nursing home or hospital

| %     | #  |                               |
|-------|----|-------------------------------|
| 25.56 | 57 | Very afraid                   |
| 19.28 | 43 | Somewhat afraid               |
| 6.28  | 14 | Neither afraid nor not afraid |
| 5.38  | 12 | Not very afraid               |
| 39.01 | 87 | Not at all afraid             |
| 4.48  | 10 | Do not know                   |

e. Dying painfully

| %     | #  |                               |
|-------|----|-------------------------------|
| 43.05 | 96 | Very afraid                   |
| 26.01 | 58 | Somewhat afraid               |
| 3.14  | 7  | Neither afraid nor not afraid |
| 3.14  | 7  | Not very afraid               |
| 20.18 | 45 | Not at all afraid             |
| 4.48  | 10 | Do not know                   |

15. How strongly do you agree or disagree that...

a. Dying is an important part of life

| %     | #   |                           |
|-------|-----|---------------------------|
| 60.09 | 134 | Strongly agree            |
| 25.11 | 56  | Agree                     |
| 4.93  | 11  | Neither agree or disagree |
| 3.59  | 8   | Disagree                  |

|      |   |                   |
|------|---|-------------------|
| 2.69 | 6 | Strongly disagree |
| 3.59 | 8 | Do not know       |

b. If someone could tell me when I would die, I would want to know

| %     | #  |                           |
|-------|----|---------------------------|
| 22.87 | 51 | Strongly agree            |
| 12.56 | 28 | Agree                     |
| 7.62  | 17 | Neither agree or disagree |
| 14.80 | 33 | Disagree                  |
| 35.43 | 79 | Strongly disagree         |
| 6.73  | 15 | Do not know               |

16. What you think about death and dying, how concerned are you that...

a. The family's money won't last

| %     | #  |                                   |
|-------|----|-----------------------------------|
| 26.01 | 58 | Very concerned                    |
| 18.83 | 42 | Concerned                         |
| 8.07  | 18 | Neither concerned nor unconcerned |
| 17.04 | 38 | Not concerned                     |
| 26.46 | 59 | Not at all concerned              |
| 3.59  | 8  | Do not know                       |

b. I will be a burden, or overload, to my family or friends

| %     | #  |                                   |
|-------|----|-----------------------------------|
| 25.56 | 57 | Very concerned                    |
| 24.22 | 54 | Concerned                         |
| 5.38  | 12 | Neither concerned nor unconcerned |
| 16.14 | 36 | Not concerned                     |
| 25.56 | 57 | Not at all concerned              |
| 3.14  | 7  | Do not know                       |

17. Which of the following health problems, if any, do you think are worse than death? SELECT ALL THAT APPLY.

| %     | #   |                                                                                                     |
|-------|-----|-----------------------------------------------------------------------------------------------------|
| 47.98 | 107 | Living with great pain                                                                              |
| 34.08 | 76  | Total physical dependency on others, for example, being in a wheelchair                             |
| 59.64 | 133 | Not being able to communicate my wishes and/or care to family members, for example, being in a coma |
| 22.87 | 51  | None are worse than death                                                                           |

### Dealing with Dying

18. How important would each of the following be to you if you were dealing with your own dying?

a. Family and friends visiting you

| %     | #   |                                   |
|-------|-----|-----------------------------------|
| 60.09 | 134 | Very important                    |
| 21.97 | 49  | Somewhat important                |
| 2.24  | 5   | Neither important nor unimportant |
| 6.73  | 15  | Not very important                |
| 5.83  | 13  | Not at all important              |
| 3.14  | 7   | Do not know                       |

b. Being able to stay in your own home

| %     | #   |                                   |
|-------|-----|-----------------------------------|
| 59.19 | 132 | Very important                    |
| 21.08 | 47  | Somewhat important                |
| 4.04  | 9   | Neither important nor unimportant |
| 8.07  | 18  | Not very important                |
| 4.04  | 9   | Not at all important              |
| 3.59  | 8   | Do not know                       |

c. Honest answers from your doctor

| %     | #   |                                   |
|-------|-----|-----------------------------------|
| 95.52 | 213 | Very important                    |
| 3.14  | 7   | Somewhat important                |
| 0.45  | 1   | Neither important nor unimportant |
| 0     | 0   | Not very important                |
| 0.90  | 2   | Not at all important              |
| 0     | 0   | Do not know                       |

d. Comfort from church services or persons such as a minister, priest, imam, or rabbi

| %     | #   |                                   |
|-------|-----|-----------------------------------|
| 52.04 | 115 | Very important                    |
| 23.98 | 53  | Somewhat important                |
| 4.98  | 11  | Neither important nor unimportant |
| 5.43  | 12  | Not very important                |
| 10.41 | 23  | Not at all important              |
| 3.17  | 7   | Do not know                       |

Frequency Missing = 2

e. Planning your own funeral

| %     | #   |                                   |
|-------|-----|-----------------------------------|
| 48.65 | 108 | Very important                    |
| 29.28 | 65  | Somewhat important                |
| 6.76  | 15  | Neither important nor unimportant |
| 6.31  | 14  | Not very important                |
| 7.66  | 17  | Not at all important              |
| 1.35  | 3   | Do not know                       |

Frequency Missing = 1

f. Being able to complete an advance directive that would let your loved ones know your wishes, if you were unable to speak for yourself

| %     | #   |                                   |
|-------|-----|-----------------------------------|
| 79.82 | 178 | Very important                    |
| 16.59 | 37  | Somewhat important                |
| 0.45  | 1   | Neither important nor unimportant |
| 0.45  | 1   | Not very important                |
| 1.35  | 3   | Not at all important              |
| 1.35  | 3   | Do not know                       |

g. Fulfilling personal goals/ pleasures

| %     | #   |                                   |
|-------|-----|-----------------------------------|
| 62.78 | 140 | Very important                    |
| 23.32 | 52  | Somewhat important                |
| 3.14  | 7   | Neither important nor unimportant |
| 4.48  | 10  | Not very important                |
| 4.04  | 9   | Not at all important              |

|      |   |             |
|------|---|-------------|
| 2.24 | 5 | Do not know |
|------|---|-------------|

h. Reviewing your life history with your family

| %     | #  |                      |
|-------|----|----------------------|
| 39.01 | 87 | Very important       |
| 29.15 | 65 | Somewhat important   |
| 7.17  | 16 | Neither important    |
| 8.52  | 19 | Not very important   |
| 14.80 | 33 | Not at all important |
| 1.35  | 3  | Do not know          |

i. Having health care professionals visit you at your home

| %     | #   |                                   |
|-------|-----|-----------------------------------|
| 47.09 | 105 | Very important                    |
| 30.49 | 68  | Somewhat important                |
| 4.48  | 10  | Neither important nor unimportant |
| 5.38  | 12  | Not very important                |
| 11.66 | 26  | Not at all important              |
| 0.90  | 2   | Do not know                       |

j. Understanding your treatment choices

| %     | #   |                                   |
|-------|-----|-----------------------------------|
| 89.24 | 199 | Very important                    |
| 9.87  | 22  | Somewhat important                |
| 0     | 0   | Neither important nor unimportant |
| 0.45  | 1   | Not very important                |
| 0.45  | 1   | Not at all important              |
| 0     | 0   | Do not know                       |

19. How important are each of the following to you when you think about dying?

a. Being physically comfortable

| %     | #   |                                   |
|-------|-----|-----------------------------------|
| 82.06 | 183 | Very important                    |
| 14.80 | 33  | Somewhat important                |
| 1.79  | 4   | Neither important nor unimportant |
| 0.90  | 2   | Not very important                |
| 0     | 0   | Not at all important              |
| 0.45  | 1   | Do not know                       |

b. Being free from pain

| %     | #   |                                   |
|-------|-----|-----------------------------------|
| 85.65 | 191 | Very important                    |
| 11.66 | 26  | Somewhat important                |
| 0.90  | 2   | Neither important nor unimportant |
| 0.90  | 2   | Not very important                |
| 0     | 0   | Not at all important              |
| 0.90  | 2   | Do not know                       |

c. Having said everything I want to say to people in my family

| %     | #   |                                   |
|-------|-----|-----------------------------------|
| 70.40 | 157 | Very important                    |
| 21.97 | 49  | Somewhat important                |
| 1.79  | 4   | Neither important nor unimportant |
| 1.79  | 4   | Not very important                |
| 3.59  | 8   | Not at all important              |
| 0.45  | 1   | Do not know                       |



|    |                                                          |     |                                   |
|----|----------------------------------------------------------|-----|-----------------------------------|
| d. | Being at peace spiritually                               |     |                                   |
|    | %                                                        | #   |                                   |
|    | 87.44                                                    | 195 | Very important                    |
|    | 8.97                                                     | 20  | Somewhat important                |
|    | 1.35                                                     | 3   | Neither important nor unimportant |
|    | 0.45                                                     | 1   | Not very important                |
|    | 1.35                                                     | 3   | Not at all important              |
|    | 0.45                                                     | 1   | Do not know                       |
| e. | Not being a burden to loved ones                         |     |                                   |
|    | %                                                        | #   |                                   |
|    | 83.41                                                    | 186 | Very important                    |
|    | 13.45                                                    | 30  | Somewhat important                |
|    | 0.90                                                     | 2   | Neither important nor unimportant |
|    | 0.90                                                     | 2   | Not very important                |
|    | 1.35                                                     | 3   | Not at all important              |
|    | 0                                                        | 0   | Do not know                       |
| f. | Knowing how to say goodbye                               |     |                                   |
|    | %                                                        | #   |                                   |
|    | 70.40                                                    | 157 | Very important                    |
|    | 20.63                                                    | 46  | Somewhat important                |
|    | 1.79                                                     | 4   | Neither important nor unimportant |
|    | 2.69                                                     | 6   | Not very important                |
|    | 2.24                                                     | 5   | Not at all important              |
|    | 2.24                                                     | 5   | Do not know                       |
| g. | Having a sense of your own worth or value                |     |                                   |
|    | %                                                        | #   |                                   |
|    | 76.23                                                    | 170 | Very important                    |
|    | 17.04                                                    | 38  | Somewhat important                |
|    | 1.35                                                     | 3   | Neither important nor unimportant |
|    | 1.35                                                     | 3   | Not very important                |
|    | 3.14                                                     | 7   | Not at all important              |
|    | 0.90                                                     | 2   | Do not know                       |
| h. | Being off machines that extend life such as life support |     |                                   |
|    | %                                                        | #   |                                   |
|    | 60.54                                                    | 135 | Very important                    |
|    | 16.14                                                    | 36  | Somewhat important                |
|    | 4.93                                                     | 11  | Neither important nor unimportant |
|    | 3.14                                                     | 7   | Not very important                |
|    | 6.28                                                     | 14  | Not at all important              |
|    | 8.97                                                     | 20  | Do not know                       |
| i. | Dying a natural death                                    |     |                                   |
|    | %                                                        | #   |                                   |
|    | 65.47                                                    | 146 | Very important                    |
|    | 19.28                                                    | 43  | Somewhat important                |
|    | 4.48                                                     | 10  | Neither important nor unimportant |
|    | 1.79                                                     | 4   | Not very important                |
|    | 3.59                                                     | 8   | Not at all important              |
|    | 5.38                                                     | 12  | Do not know                       |

20. If death were likely to happen in the next few weeks, and you could choose where to die, where would you MOST want to die? CHECK ONE answer only.

| %     | #   |                                |
|-------|-----|--------------------------------|
| 62.16 | 138 | At home                        |
| 0.90  | 2   | In an assisted-living facility |
| 17.57 | 39  | In a hospital                  |
| 0.45  | 1   | In a nursing home              |
| 3.15  | 7   | In a residential hospice       |
| 15.77 | 35  | Do not know                    |

Frequency Missing = 1

21. Below are some statements related to pain near the end-of-life that have been expressed by people. How strongly do you agree or disagree with each statement?

a. I am afraid my doctor may not believe I am in pain and treat my pain

| %     | #  |                            |
|-------|----|----------------------------|
| 13.57 | 30 | Strongly agree             |
| 15.38 | 34 | Agree                      |
| 7.24  | 16 | Neither agree nor disagree |
| 25.34 | 56 | Disagree                   |
| 32.13 | 71 | Strongly disagree          |
| 6.33  | 14 | Do not know                |

Frequency Missing = 2

b. I would only take pain medicines when the pain is severe

| %     | #  |                           |
|-------|----|---------------------------|
| 40.09 | 89 | Strongly agree            |
| 37.84 | 84 | Agree                     |
| 2.25  | 5  | Neither agree or disagree |
| 8.56  | 19 | Disagree                  |
| 8.56  | 19 | Strongly disagree         |
| 2.70  | 6  | Do not know               |

Frequency Missing = 1

c. I am afraid I will become addicted to pain medicines over time

| %     | #  |                           |
|-------|----|---------------------------|
| 14.80 | 33 | Strongly agree            |
| 14.80 | 33 | Agree                     |
| 8.07  | 18 | Neither agree or disagree |
| 26.46 | 59 | Disagree                  |
| 32.29 | 72 | Strongly disagree         |
| 3.59  | 8  | Do not know               |

d. I would take the lowest amount of medicine possible to save larger doses for later when the pain is worse

| %     | #  |                            |
|-------|----|----------------------------|
| 33.63 | 75 | Strongly agree             |
| 29.60 | 66 | Agree                      |
| 7.62  | 17 | Neither agree nor disagree |
| 14.80 | 33 | Disagree                   |
| 9.42  | 21 | Strongly disagree          |
| 4.93  | 11 | Don't know                 |

e. I am afraid I would be given too much pain medicine

| %     | #  |                           |
|-------|----|---------------------------|
| 7.17  | 16 | Strongly agree            |
| 10.76 | 24 | Agree                     |
| 9.42  | 21 | Neither agree or disagree |
| 38.57 | 86 | Disagree                  |
| 28.70 | 64 | Strongly disagree         |
| 5.38  | 12 | Don't know                |

22. Have you heard of hospice services?

| %     | #   |                             |
|-------|-----|-----------------------------|
| 87.89 | 196 | Yes                         |
| 12.11 | 27  | No (if no skip to Q23 & 24) |

23. How did you learn about hospice services?

| %     | #   |                                                  |
|-------|-----|--------------------------------------------------|
| 67.36 | 130 | I know someone who used hospice services         |
| 2.59  | 5   | I have used hospice services myself              |
| 1.55  | 3   | I am/was a hospice volunteer                     |
| 9.33  | 18  | I heard from a health care professional          |
| 9.84  | 19  | I read literature/newspaper/TV/radio/other media |
| 8.29  | 16  | I heard from others                              |
| 1.04  | 2   | No response                                      |

Frequency Missing = 3

24. If you were dying, would you want hospice support?

| %     | #   |                      |
|-------|-----|----------------------|
| 53.37 | 103 | Yes                  |
| 15.54 | 30  | No                   |
| 30.05 | 58  | Do not know/not sure |
| 1.04  | 2   | No response          |

Frequency Missing = 3

### **Spiritual Well-Being**

25. Do you consider yourself...? (If not religious/spiritual, skip Q26 and Q27)

| %     | #   |                              |
|-------|-----|------------------------------|
| 41.44 | 92  | Very religious/spiritual     |
| 48.20 | 107 | Somewhat religious/spiritual |
| 4.95  | 11  | Not very religious/spiritual |
| 4.05  | 9   | Not religious/spiritual      |
| 0.45  | 1   | Do not know                  |
| 0.90  | 2   | No response                  |

Frequency Missing = 1

26. How often do you attend religious or spiritual services?

| %     | #  |             |
|-------|----|-------------|
| 19.91 | 43 | Always      |
| 22.22 | 48 | Very often  |
| 28.24 | 61 | Sometimes   |
| 20.83 | 45 | Rarely      |
| 8.33  | 18 | Never       |
| 0.46  | 1  | Do not know |

27. How often does your religion or spirituality help you face your fears or do what you were afraid to do?

| %     | #   |                     |
|-------|-----|---------------------|
| 52.09 | 112 | Everyday            |
| 12.09 | 26  | A few times a week  |
| 14.42 | 31  | A few times a month |
| 13.02 | 28  | Rarely              |
| 5.58  | 12  | Never               |
| 2.79  | 6   | Do not know         |

**About You**

28. How many times in your life have you been seen at an emergency room?

| %     | #  |     |
|-------|----|-----|
| 2.29  | 5  | 0   |
| 2.29  | 5  | 1   |
| 8.26  | 18 | 2   |
| 8.26  | 18 | 3   |
| 10.55 | 23 | 4   |
| 10.09 | 22 | 5   |
| 5.96  | 13 | 6   |
| 4.13  | 9  | 7   |
| 2.29  | 5  | 8   |
| 0.92  | 2  | 9   |
| 14.68 | 32 | 10  |
| 2.29  | 5  | 12  |
| 2.29  | 5  | 15  |
| 11.47 | 25 | 20  |
| 0.46  | 1  | 24  |
| 2.75  | 6  | 30  |
| 0.46  | 1  | 40  |
| 4.13  | 9  | 50  |
| 0.46  | 1  | 60  |
| 0.46  | 1  | 65  |
| 0.46  | 1  | 70  |
| 4.13  | 9  | 100 |
| 0.46  | 1  | 220 |
| 0.46  | 1  | 999 |

Frequency Missing = 5

29. How many times in your life have you ever been hospitalized?

| %     | #  |    |
|-------|----|----|
| 5.94  | 13 | 0  |
| 9.13  | 20 | 1  |
| 14.61 | 32 | 2  |
| 11.87 | 26 | 3  |
| 12.33 | 27 | 4  |
| 16.89 | 37 | 5  |
| 5.48  | 12 | 6  |
| 2.74  | 6  | 7  |
| 0.91  | 2  | 8  |
| 0.91  | 2  | 9  |
| 6.85  | 15 | 10 |
| 2.28  | 5  | 12 |

|      |   |    |
|------|---|----|
| 1-37 | 3 | 15 |
| 3-20 | 7 | 20 |
| 1-83 | 4 | 25 |
| 1-37 | 3 | 30 |
| 0-46 | 1 | 35 |
| 0-91 | 2 | 40 |
| 0-46 | 1 | 50 |
| 0-46 | 1 | 60 |

Frequency Missing = 4

29.a. How many nights have you spent in a hospital in the last year?

| %     | #   |     |
|-------|-----|-----|
| 65-47 | 146 | 0   |
| 3-59  | 8   | 1   |
| 7-17  | 16  | 2   |
| 5-38  | 12  | 3   |
| 4-04  | 9   | 4   |
| 2-24  | 5   | 5   |
| 0-45  | 1   | 6   |
| 1-79  | 4   | 7   |
| 0-45  | 1   | 10  |
| 1-35  | 3   | 12  |
| 1-35  | 3   | 14  |
| 0-45  | 1   | 15  |
| 0-45  | 1   | 16  |
| 0-90  | 2   | 20  |
| 0-90  | 2   | 21  |
| 0-45  | 1   | 25  |
| 1-79  | 4   | 30  |
| 0-90  | 2   | 90  |
| 0-45  | 1   | 120 |
| 0-45  | 1   | 180 |

29.b. How many of those hospitalizations were psychiatric hospitalizations? For example, for behavior problems or depression.

| %     | #   |    |
|-------|-----|----|
| 86-11 | 186 | 0  |
| 8-33  | 18  | 1  |
| 2-31  | 5   | 2  |
| 0-93  | 2   | 3  |
| 0-46  | 1   | 4  |
| 0-46  | 1   | 5  |
| 0-46  | 1   | 6  |
| 0-46  | 1   | 7  |
| 0-46  | 1   | 17 |

29.c. How many nights have you spent psychiatrically hospitalized in the past year?

| %     | #   |   |
|-------|-----|---|
| 95-71 | 201 | 0 |
| 0-95  | 2   | 1 |
| 0-48  | 1   | 2 |
| 0-48  | 1   | 3 |

|      |   |    |
|------|---|----|
| 0.48 | 1 | 7  |
| 0.48 | 1 | 10 |
| 0.95 | 2 | 14 |
| 0.48 | 1 | 30 |

| Variable                                                    | N   | Mean  | Std. Dev. | Min. | Max. |
|-------------------------------------------------------------|-----|-------|-----------|------|------|
| Number of times in the ER in life                           | 218 | 20.45 | 71.38     | 0    | 999  |
| Number of times hospitalized in life                        | 219 | 6.46  | 8.32      | 0    | 60   |
| Number of nights in a hospital in the last year             | 223 | 4.47  | 17.34     | 0    | 180  |
| Number of psychiatric hospitalizations                      | 216 | 0.34  | 1.44      | 0    | 17   |
| Number of nights in a psychiatric hospital in the last year | 210 | 0.39  | 2.61      | 0    | 30   |

**During the Past Four Weeks**

30. How many nights did you stay in a hospital?

| %     | #   |                                  |
|-------|-----|----------------------------------|
| 92.38 | 206 | No nights spent in the hospital  |
| 2.69  | 3   | 1-2 nights spent in the hospital |
| 2.24  | 5   | 3-5 nights                       |
| 0.45  | 1   | 6-10 nights                      |
| 1.79  | 4   | 11-20 nights                     |
| 0.45  | 1   | >20 nights                       |

Frequency Missing = 3

31. How healthy are you feeling right now?

| %     | #  |                  |
|-------|----|------------------|
| 28.25 | 63 | Excellent health |
| 30.04 | 67 | Very good health |
| 22.42 | 50 | Good health      |
| 17.04 | 38 | Fair health      |
| 2.24  | 5  | Poor health      |

32. Is your mother alive?

| %     | #   |             |
|-------|-----|-------------|
| 48.88 | 109 | No          |
| 50.22 | 112 | Yes         |
| 0.90  | 2   | Do not know |

33. Is your father alive?

| %     | #   |             |
|-------|-----|-------------|
| 65.47 | 146 | No          |
| 31.39 | 70  | Yes         |
| 3.14  | 7   | Do not know |

**Supplement Table 2. Responses to Lyon Advance Care Planning Survey responses from adults living with HIV/AIDS by race (N=223).**

**Advance Planning and Preparation**

1. Have you ever written down any thoughts about your future health plans?

| <b>African Americans N (%)</b> | <b>Non-African Americans N (%)</b> |                        |
|--------------------------------|------------------------------------|------------------------|
| 50 (26.0)                      | 9 (36)                             | <b>Yes, definitely</b> |
| 8 (4.2)                        | 1 (4.0)                            | <b>Yes, probably</b>   |
| 12 (6.3)                       | 3 (12.0)                           | <b>Probably</b>        |
| 13 (6.8)                       | 2 (40.0)                           | <b>Probably not</b>    |
| 102 (53.1)                     | 10 (40.0)                          | <b>Definitely not</b>  |
| 7 (3.7)                        | 0 (0.0)                            | <b>Do not know</b>     |

2. Advance directives allow people to make their healthcare choices known before becoming very ill or dying.

- a. Have you ever heard about and completed a Health Care Power of Attorney (HCPA), in which you name someone to make decisions about your healthcare in case you could not

| <b>African Americans N (%)</b> | <b>Non-African Americans N (%)</b> |                                           |
|--------------------------------|------------------------------------|-------------------------------------------|
| 41 (21.4)                      | 12 (4.0)                           | <b>Have heard about and completed</b>     |
| 123 (64.1)                     | 11 (44.0)                          | <b>Have heard about but not completed</b> |
| 24 (12.5)                      | 2 (8.0)                            | <b>Have not heard about</b>               |
| 4 (2.1)                        | 0 (0.0)                            | <b>Do not know</b>                        |

- b. Have you ever heard about and completed an Advance Directive, such as Five Wishes?

| <b>African Americans N (%)</b> | <b>Non-African Americans N (%)</b> |                                           |
|--------------------------------|------------------------------------|-------------------------------------------|
| 23 (12.0)                      | 9 (36.0)                           | <b>Have heard about and completed</b>     |
| 93 (48.4)                      | 10 (40.0)                          | <b>Have heard about but not completed</b> |
| 69 (35.9)                      | 5 (20.0)                           | <b>Have not heard about</b>               |
| 7 (3.7)                        | 1 (4.0)                            | <b>Do not know</b>                        |



3. a. Whether you have completed any advance directives/pre-plans or not, have you talked about your wishes for care at end of life with anyone? SELECT ALL THAT APPLY.

| <b>African Americans</b> | <b>Non-African Americans</b> |                                                     |
|--------------------------|------------------------------|-----------------------------------------------------|
| <b>N (%)</b>             | <b>N (%)</b>                 |                                                     |
| 44 (22.9)                | 11 (44.0)                    | <b>Spouse/partner</b>                               |
| 34 (17.7)                | 5 (20.0)                     | <b>Parents</b>                                      |
| 37 (19.3)                | 7 (28.8)                     | <b>Siblings (brother/sister)</b>                    |
| 30 (15.6)                | 9 (36.0)                     | <b>Friends</b>                                      |
| 12 (6.3)                 | 1 (4.0)                      | <b>Boyfriend/girlfriend</b>                         |
| 5 (2.6)                  | 2 (8.0)                      | <b>Lawyer</b>                                       |
| 15 (7.8)                 | 3 (12.0)                     | <b>Primary Physician</b>                            |
| 8 (4.2)                  | 1 (4.0)                      | <b>Clergy (such as minister, rabbi, imam, etc.)</b> |
| 36 (18.8)                | 5 (20.0)                     | <b>Other</b>                                        |

- b. Do you have any children?

| <b>African Americans</b> | <b>Non-African Americans</b> |                                     |
|--------------------------|------------------------------|-------------------------------------|
| <b>N (%)</b>             | <b>N (%)</b>                 |                                     |
| 111 (57.8)               | 8 (32.0)                     | <b>Yes (proceed to question 3c)</b> |
| 81 (42.2)                | 17 (68.0)                    | <b>No (proceed to question 4)</b>   |

- c. If you have children, have you talked about plans for who will take care of your child/children, if you are not able to? SELECT ALL THAT APPLY.

| <b>African Americans</b> | <b>Non-African Americans</b> |                             |
|--------------------------|------------------------------|-----------------------------|
| <b>N (%)</b>             | <b>N (%)</b>                 |                             |
| 11 (5.7)                 | 1 (4.0)                      | <b>Spouse/partner</b>       |
| 16 (8.3)                 | 0 (0.0)                      | <b>Parents</b>              |
| 13 (6.8)                 | 0 (0.0)                      | <b>Siblings</b>             |
| 3 (1.6)                  | 0 (0.0)                      | <b>Friends</b>              |
| 0 (0.0)                  | 0 (0.0)                      | <b>Boyfriend/girlfriend</b> |
| 0 (0.0)                  | 0 (0.0)                      | <b>Lawyer</b>               |
| 0 (0.0)                  | 0 (0.0)                      | <b>Primary Physician</b>    |
| 0 (0.0)                  | 0 (0.0)                      | <b>Clergy</b>               |
| 54 (28.1)                | 7 (28.0)                     | <b>Other</b>                |

4. If you were ill and knew that you would not get better, who would you want to be involved in decision about your end-of-life care? SELECT ALL THAT APPLY.

| <b>African Americans</b> | <b>Non-African Americans</b> |                     |
|--------------------------|------------------------------|---------------------|
| <b>N (%)</b>             | <b>N (%)</b>                 |                     |
| 104 (54.2)               | 21 (84.0)                    | <b>Myself</b>       |
| 150 (78.1)               | 18 (72.0)                    | <b>My Family</b>    |
| 78 (40.6)                | 16 (64.0)                    | <b>My Doctor</b>    |
| 70 (36.5)                | 9 (36.0)                     | <b>Someone else</b> |

5. When do you think it is the best time to bring up end-of-life decisions?

| <b>African Americans</b> | <b>Non-African Americans</b> |                                                                |
|--------------------------|------------------------------|----------------------------------------------------------------|
| <b>N (%)</b>             | <b>N (%)</b>                 |                                                                |
| 119 (62.0)               | 19 (76.0)                    | <b>Before getting sick, while healthy</b>                      |
| 15 (7.8)                 | 0 (0.0)                      | <b>When first diagnosed with a life-threatening illness</b>    |
| 7 (3.7)                  | 0 (0.0)                      | <b>When first sick from a life-threatening illness</b>         |
| 8 (4.2)                  | 0 (0.0)                      | <b>When first hospitalized with a life-threatening illness</b> |
| 2 (1.0)                  | 0 (0.0)                      | <b>If dying</b>                                                |
| 34 (17.7)                | 5 (20.0)                     | <b>All of the above</b>                                        |
| 1 (0.52)                 | 0 (0.0)                      | <b>Never</b>                                                   |
| 4 (2.1)                  | 0 (0.0)                      | <b>Do not know</b>                                             |
| 2 (1.0)                  | 1 (4.0)                      | <b>Other</b>                                                   |

6. Who are the best people/person on the treatment team to bring it up with you? SELECT ALL THAT APPLY.

| <b>African Americans</b> | <b>Non-African Americans</b> |                           |
|--------------------------|------------------------------|---------------------------|
| <b>N (%)</b>             | <b>N (%)</b>                 |                           |
| 164 (85.4)               | 19 (76.0)                    | <b>Physician</b>          |
| 35 (18.2)                | 8 (32.0)                     | <b>Nurse Practitioner</b> |
| 37 (19.3)                | 8 (32.0)                     | <b>Nurse</b>              |
| 71 (37.0)                | 15 (60.0)                    | <b>Social Worker</b>      |
| 36 (18.8)                | 11 (44.0)                    | <b>Psychologist</b>       |
| 47 (24.5)                | 9 (36.0)                     | <b>Case Manager</b>       |
| 37 (19.3)                | 8 (32.0)                     | <b>Chaplain</b>           |
| 29 (15.1)                | 10 (40.0)                    | <b>Patient Advocate</b>   |
| 25 (13.0)                | 5 (20.0)                     | <b>Other</b>              |

7. Do you believe that once you make an important medical decision, for example, to be put on a respirator, a machine that breathes for you, that you would be able to change your mind?

| African Americans N (%) | Non-African Americans N (%) |                |
|-------------------------|-----------------------------|----------------|
| 79 (41.4)               | 9 (36.0)                    | Yes definitely |
| 19 (10.0)               | 4 (16.0)                    | Very probable  |
| 23 (12.0)               | 5 (20.0)                    | Probably       |
| 14 (7.3)                | 2 (8.0)                     | Probably not   |
| 27 (14.1)               | 2 (8.0)                     | Definitely no  |
| 29 (15.2)               | 3 (12.0)                    | Do not know    |

8. Do you think your doctor or the hospital will respect your wishes, that is, do what you want about medical care?

| African Americans N (%) | Non-African Americans N (%) |                |
|-------------------------|-----------------------------|----------------|
| 136 (70.8)              | 18 (72.0)                   | Yes definitely |
| 20 (10.4)               | 2 (8.0)                     | Very probable  |
| 20(10.4))               | 4 (16.0)                    | Probably       |
| 4 (2.1)                 | 0 (0.0)                     | Probably not   |
| 6 (3.1)                 | 0 (0.0)                     | Definitely no  |
| 6 (3.1)                 | 1 (4.0)                     | Do not know    |

9. Do you think your parent/ guardian/ surrogate understands your wishes?

| African Americans N (%) | Non-African Americans N (%) |                |
|-------------------------|-----------------------------|----------------|
| 139 (72.4)              | 17 (68.0)                   | Yes definitely |
| 20 (10.4)               | 2 (8.0)                     | Very probable  |
| 15 (7.8)                | 2(8.0)                      | Probably       |
| 8 (4.2)                 | 1 (4.0)                     | Probably not   |
| 3 (1.6)                 | 0 (0.0)                     | Definitely no  |
| 7 (3.7)                 | 3 (12.0)                    | Do not know    |

10. Do you think your parent/guardian/surrogate will respect your wishes, that is, do what you want about your medical care?

| <b>African<br/>Americans N<br/>(%)</b> | <b>Non-African<br/>Americans N<br/>(%)</b> |                       |
|----------------------------------------|--------------------------------------------|-----------------------|
| 149 (77.6)                             | 19 (76.0)                                  | <b>Yes definitely</b> |
| 17 (8.9)                               | 3 (12.0)                                   | <b>Very probable</b>  |
| 17 (8.9)                               | 2 (8.0)                                    | <b>Probably</b>       |
| 3 (1.6)                                | 0 (0.0)                                    | <b>Probably not</b>   |
| 1 (0.5)                                | 0 (0.0)                                    | <b>Definitely no</b>  |
| 5 (2.6)                                | 1 (4.0)                                    | <b>Do not know</b>    |

### **Thoughts about Death and Dying**

11. How often has death and dying been talked about in your family?

| <b>African<br/>Americans N<br/>(%)</b> | <b>Non-African<br/>Americans N<br/>(%)</b> |                       |
|----------------------------------------|--------------------------------------------|-----------------------|
| 21 (10.9)                              | 2 (8.0)                                    | <b>Yes definitely</b> |
| 22 (11.5)                              | 5 (20.0)                                   | <b>Very probable</b>  |
| 69 (35.9)                              | 12 (48.0)                                  | <b>Probably</b>       |
| 53 (27.6)                              | 5 (20.0)                                   | <b>Probably not</b>   |
| 25 (13.0)                              | 1 (4.0)                                    | <b>Definitely no</b>  |
| 2 (1.0)                                | 0 (0.0)                                    | <b>Do not know</b>    |

12. How comfortable are you talking about death?

| <b>African<br/>Americans N<br/>(%)</b> | <b>Non-African<br/>Americans N<br/>(%)</b> |                                              |
|----------------------------------------|--------------------------------------------|----------------------------------------------|
| 87 (45.3)                              | 16 (64.0)                                  | <b>Very comfortable</b>                      |
| 57 (29.7)                              | 6 (24.0)                                   | <b>Somewhat comfortable</b>                  |
| 21 (10.9)                              | 0 (0.0)                                    | <b>Neither comfortable nor uncomfortable</b> |
| 13 (6.8)                               | 1 (4.0)                                    | <b>Not very comfortable</b>                  |
| 11 (5.7)                               | 2 (8.0)                                    | <b>Not at all comfortable</b>                |
| 3 (1.6)                                | 0 (0.0)                                    | <b>Do not know</b>                           |

13. How likely are you to...

- a. Attend funerals or memorial services when a loved one, friend or a classmate dies

| African Americans N (%) | Non-African Americans N (%) |                            |
|-------------------------|-----------------------------|----------------------------|
| 121 (63.0)              | 13 (52.0)                   | Very likely                |
| 44 (22.9)               | 7 (28.0)                    | Somewhat likely            |
| 5 (2.6)                 | 0 (0.0)                     | Neither likely or unlikely |
| 8 (4.2)                 | 2 (8.0)                     | Not very likely            |
| 14 (7.3)                | 2 (8.0)                     | Not at all likely          |
| 0 (0.0)                 | 1 (4.0)                     | Do not know                |

- b. Avoid medical checkups because you are afraid the doctor will find “something serious”

| African Americans N (%) | Non-African Americans N (%) |                            |
|-------------------------|-----------------------------|----------------------------|
| 8 (4.2)                 | 0 (0.0)                     | Very likely                |
| 6 (3.1)                 | 1 (4.0)                     | Somewhat likely            |
| 7 (3.7)                 | 1 (4.0)                     | Neither likely or unlikely |
| 10 (5.2)                | 0 (0.0)                     | Not very likely            |
| 154 (80.2)              | 23 (92.0)                   | Not at all likely          |
| 7 (3.7)                 | 0 (0.0)                     | Do not know                |

- c. Speak freely to loved ones about death and dying

| African Americans N (%) | Non-African Americans N (%) |                            |
|-------------------------|-----------------------------|----------------------------|
| 90 (46.9)               | 17 (68.0)                   | Very likely                |
| 63 (32.8)               | 3 (12.0)                    | Somewhat likely            |
| 6 (3.1)                 | 1 (4.0)                     | Neither likely or unlikely |
| 13 (6.8)                | 3 (12.0)                    | Not very likely            |
| 17 (8.9)                | 1 (4.0)                     | Not at all likely          |
| 3 (1.6)                 | 0 (0.0)                     | Do not know                |

- d. Visit or telephone a friend or relative who has recently lost a loved one in order to see how they are doing

|      | <b>African Americans N (%)</b> | <b>Non-African Americans N (%)</b> |                                   |
|------|--------------------------------|------------------------------------|-----------------------------------|
| e. P | 128 (66.7)                     | 17 (68.0)                          | <b>Very likely</b>                |
| r    | 45 (23.4)                      | 7 (28.0)                           | <b>Somewhat likely</b>            |
| e    | 5 (2.6)                        | 1 (4.0)                            | <b>Neither likely or unlikely</b> |
| p    | 2 (1.0)                        | 0 (0.0)                            | <b>Not very likely</b>            |
| l    | 9 (4.7)                        | 0 (0.0)                            | <b>Not at all likely</b>          |
| a    | 3 (1.6)                        | 0 (0.0)                            | <b>Do not know</b>                |

your own funeral, for example, choose someone to speak or choose the music you would want

|  | <b>African Americans N (%)</b> | <b>Non-African Americans N (%)</b> |                                   |
|--|--------------------------------|------------------------------------|-----------------------------------|
|  | 93 (48.4)                      | 13 (52.0)                          | <b>Very likely</b>                |
|  | 42 (21.9)                      | 3 (12.0)                           | <b>Somewhat likely</b>            |
|  | 11 (5.7)                       | 2 (8.0)                            | <b>Neither likely or unlikely</b> |
|  | 10 (5.2)                       | 2 (8.0)                            | <b>Not very likely</b>            |
|  | 26 (13.5)                      | 5 (20.0)                           | <b>Not at all likely</b>          |
|  | 10 (5.2)                       | 0 (0.0)                            | <b>Do not know</b>                |

14. How afraid if at all, are you of...

- a. Dying from a long term illness

|  | <b>African Americans N (%)</b> | <b>Non-African Americans N (%)</b> |                                      |
|--|--------------------------------|------------------------------------|--------------------------------------|
|  | 35 (18.2)                      | 1 (4.0)                            | <b>Very afraid</b>                   |
|  | 48 (25.0)                      | 9 (36.0)                           | <b>Somewhat afraid</b>               |
|  | 16 (8.3)                       | 3 (12.0)                           | <b>Neither afraid nor not afraid</b> |
|  | 10 (5.2)                       | 4 (16.0)                           | <b>Not very afraid</b>               |
|  | 78 (40.6)                      | 7 (28.0)                           | <b>Not at all afraid</b>             |
|  | 5 (2.6)                        | 1 (4.0)                            | <b>Do not know</b>                   |

b. Dying suddenly, such as an accident, or being killed

| African Americans N (%) | Non-African Americans N (%) |                               |
|-------------------------|-----------------------------|-------------------------------|
| 42 (21.9)               | 3 (12.0)                    | Very afraid                   |
| 39 (20.3)               | 4 (16.0)                    | Somewhat afraid               |
| 11 (5.7)                | 2 (8.0)                     | Neither afraid nor not afraid |
| 10 (5.2)                | 2 (8.0)                     | Not very afraid               |
| 87 (45.3)               | 14 (56.0)                   | Not at all afraid             |
| 3 (1.6)                 | 0 (0.0)                     | Do not know                   |

c. Dying alone

| African Americans N (%) | Non-African Americans N (%) |                               |
|-------------------------|-----------------------------|-------------------------------|
| 46 (24.0)               | 3 (12.0)                    | Very afraid                   |
| 39 (20.3)               | 4 (16.0)                    | Somewhat afraid               |
| 6 (3.1)                 | 4 (16.0)                    | Neither afraid nor not afraid |
| 8 (4.2)                 | 1 (4.0)                     | Not very afraid               |
| 87 (45.3)               | 12 (48.0)                   | Not at all afraid             |
| 6 (3.1)                 | 1 (4.0)                     | Do not know                   |

d. Dying in an institution such as a nursing home or hospital

| African Americans N (%) | Non-African Americans N (%) |                               |
|-------------------------|-----------------------------|-------------------------------|
| 55 (28.7)               | 2 (8.0)                     | Very afraid                   |
| 33 (17.2)               | 8 (32.0)                    | Somewhat afraid               |
| 10 (5.2)                | 4 (16.0)                    | Neither afraid nor not afraid |
| 9 (4.7)                 | 3 (12.0)                    | Not very afraid               |
| 76 (39.6)               | 8 (32.0)                    | Not at all afraid             |
| 9 (4.7)                 | 0 (0.0)                     | Do not know                   |

e. Dying painfully

| African Americans N (%) | Non-African Americans N (%) |                               |
|-------------------------|-----------------------------|-------------------------------|
| 84 (43.7)               | 10 (40.0)                   | Very afraid                   |
| 47 (24.5)               | 9 (36.0)                    | Somewhat afraid               |
| 5 (2.6)                 | 2 (8.0)                     | Neither afraid nor not afraid |
| 4 (2.1)                 | 2 (8.0)                     | Not very afraid               |
| 43 (22.4)               | 1 (4.0)                     | Not at all afraid             |
| 9 (4.7)                 | 1 (4.0)                     | Do not know                   |

15. How strongly do you agree or disagree that...

a. Dying is an important part of life

| African Americans N (%) | Non-African Americans N (%) |                           |
|-------------------------|-----------------------------|---------------------------|
| 113 (21.9)              | 17 (68.0)                   | Strongly agree            |
| 52 (20.3)               | 3 (12.0)                    | Agree                     |
| 7 (5.7)                 | 3 (12.0)                    | Neither agree or disagree |
| 8 (5.2)                 | 0 (0.0)                     | Disagree                  |
| 5 (45.3)                | 1 (4.0)                     | Strongly disagree         |
| 7 (1.6)                 | 1 (4.0)                     | Do not know               |

b. If someone could tell me when I would die, I would want to know

| African Americans N (%) | Non-African Americans N (%) |                           |
|-------------------------|-----------------------------|---------------------------|
| 47 (21.9)               | 3 (12.0)                    | Strongly agree            |
| 26 (20.3)               | 2 (8.0)                     | Agree                     |
| 10 (5.7)                | 5 (20.0)                    | Neither agree or disagree |
| 26 (5.2)                | 7 (28.0)                    | Disagree                  |
| 68 (45.3)               | 8 (32.0)                    | Strongly disagree         |
| 15 (1.6)                | 0 (0.0)                     | Do not know               |



16. What you think about death and dying, how concerned are you that...

a. The family's money won't last

| African Americans N (%) | Non-African Americans N (%) |                                   |
|-------------------------|-----------------------------|-----------------------------------|
| 54 (28.1)               | 3 (12.0)                    | Very concerned                    |
| 35 (18.2)               | 5 (20.0)                    | Concerned                         |
| 14 (7.3)                | 3 (12.0)                    | Neither concerned nor unconcerned |
| 34 (17.7)               | 4 (16.0)                    | Not concerned                     |
| 47 (24.5)               | 10 (40.0)                   | Not at all concerned              |
| 8 (4.2)                 | 0 (0.0)                     | Do not know                       |

b. I will be a burden, or overload, to my family or friends

| African Americans N (%) | Non-African Americans N (%) |                                   |
|-------------------------|-----------------------------|-----------------------------------|
| 54 (28.1)               | 3 (12.0)                    | Very concerned                    |
| 46 (24.0)               | 6 (24.0)                    | Concerned                         |
| 7 (3.7)                 | 5 (20.0)                    | Neither concerned nor unconcerned |
| 31 (16.2)               | 4 (16.0)                    | Not concerned                     |
| 47 (24.5)               | 7 (28.0)                    | Not at all concerned              |
| 7 (3.7)                 | 0 (0.0)                     | Do not know                       |

17. Which of the following health problems, if any, do you think are worse than death?  
SELECT ALL THAT APPLY.

| African Americans N (%) | Non-African Americans N (%) |                                                                                                     |
|-------------------------|-----------------------------|-----------------------------------------------------------------------------------------------------|
| 86 (44.8)               | 17 (68.0)                   | Living with great pain                                                                              |
| 62 (32.3)               | 11 (44.0)                   | Total physical dependency on others, for example, being in a wheelchair                             |
| 109 (56.8)              | 20 (80.0)                   | Not being able to communicate my wishes and/or care to family members, for example, being in a coma |
| 48 (25.0)               | 2 (8.0)                     | None are worse than death                                                                           |

**Dealing with Dying**

18. How important would each of the following be to you if you were dealing with your own dying?

a. Family and friends visiting you

| African Americans N (%) | Non-African Americans N (%) |                                   |
|-------------------------|-----------------------------|-----------------------------------|
| 116 (60.4)              | 14 (56.0)                   | Very important                    |
| 44 (22.9)               | 3 (12.0)                    | Somewhat important                |
| 4 (2.1)                 | 1 (4.0)                     | Neither important nor unimportant |
| 10 (5.2)                | 5 (20.0)                    | Not very important                |
| 11 (5.7)                | 2 (8.0)                     | Not at all important              |
| 7 (3.7)                 | 0 (0.0)                     | Do not know                       |

b. Being able to stay in your own home

| African Americans N (%) | Non-African Americans N (%) |                                   |
|-------------------------|-----------------------------|-----------------------------------|
| 116 (60.4)              | 13 (52.0)                   | Very important                    |
| 38 (19.8)               | 7 (28.0)                    | Somewhat important                |
| 7 (3.7)                 | 2 (8.0)                     | Neither important nor unimportant |
| 16 (8.3)                | 2 (8.0)                     | Not very important                |
| 8 (4.2)                 | 1 (4.0)                     | Not at all important              |
| 7 (3.7)                 | 0 (0.0)                     | Do not know                       |

c. H  
o  
n  
e  
s  
t

answers from your doctor

| African Americans N (%) | Non-African Americans N (%) |                                   |
|-------------------------|-----------------------------|-----------------------------------|
| 183 (95.3)              | 25 (100.0)                  | Very important                    |
| 6 (3.1)                 | 0 (0.0)                     | Somewhat important                |
| 1 (0.52)                | 0 (0.0)                     | Neither important nor unimportant |
| 0 (0.0)                 | 0 (0.0)                     | Not very important                |
| 2 (1.0)                 | 0 (0.0)                     | Not at all important              |
| 0 (0.0)                 | 0 (0.0)                     | Do not know                       |

d. Comfort from church services or persons such as a minister, priest, imam, or rabbi

| African Americans N (%) | Non-African Americans N (%) |                                   |
|-------------------------|-----------------------------|-----------------------------------|
| 107 (56.3)              | 7 (28.0)                    | Very important                    |
| 49 (25.8)               | 2 (8.0)                     | Somewhat important                |
| 7 (3.7)                 | 4 (16.0)                    | Neither important nor unimportant |
| 9 (4.7)                 | 2 (8.0)                     | Not very important                |
| 13 (6.8)                | 9 (36.0)                    | Not at all important              |
| 5 (2.6)                 | 1 (4.0)                     | Do not know                       |

e. Planning your own funeral

| African Americans N (%) | Non-African Americans N (%) |                                   |
|-------------------------|-----------------------------|-----------------------------------|
| 96 (50.3)               | 10 (40.0)                   | Very important                    |
| 58 (30.4)               | 7 (28.0)                    | Somewhat important                |
| 10 (5.2)                | 4 (16.0)                    | Neither important nor unimportant |
| 11 (5.8)                | 2 (8.0)                     | Not very important                |
| 13 (6.8)                | 2 (8.0)                     | Not at all important              |
| 3 (1.6)                 | 0 (0.0)                     | Do not know                       |

f. Being able to complete an advance directive that would let your loved ones know your wishes, if you were unable to speak for yourself

| African Americans N (%) | Non-African Americans N (%) |                                   |
|-------------------------|-----------------------------|-----------------------------------|
| 154 (80.2)              | 22 (88.0)                   | Very important                    |
| 32 (16.7)               | 2 (8.0)                     | Somewhat important                |
| 0 (0.0)                 | 0 (0.0)                     | Neither important nor unimportant |
| 1 (0.52)                | 0 (20.0)                    | Not very important                |
| 2 (1.0)                 | 1 (4.0)                     | Not at all important              |
| 3 (1.6)                 | 0 (0.0)                     | Do not know                       |

g. Fulfilling personal goals/ pleasures

| <b>African<br/>Americans N<br/>(%)</b> | <b>Non-African<br/>Americans N<br/>(%)</b> |
|----------------------------------------|--------------------------------------------|
| 123 (64.1)                             | 15 (60.0)                                  |
| 47 (24.5)                              | 3 (12.0)                                   |
| 3 (1.6)                                | 3 (12.0)                                   |
| 9 (4.7)                                | 0 (0.0)                                    |
| 7 (3.7)                                | 2 (8.0)                                    |
| 3 (1.6)                                | 2 (8.0)                                    |

**Very important**  
**Somewhat important**  
**Neither important nor unimportant**  
**Not very important**  
**Not at all important**  
**Do not know**

h. Reviewing your life history with your family

| <b>African<br/>Americans N<br/>(%)</b> | <b>Non-African<br/>Americans N<br/>(%)</b> |
|----------------------------------------|--------------------------------------------|
| 79 (41.2)                              | 6 (24.0)                                   |
| 56 (29.2)                              | 8 (32.0)                                   |
| 10 (5.2)                               | 5 (20.0)                                   |
| 17 (8.9)                               | 1 (4.0)                                    |
| 28 (14.6)                              | 4 (16.0)                                   |
| 2 (1.0)                                | 1 (4.0)                                    |

**Very important**  
**Somewhat important**  
**Neither important nor unimportant**  
**Not very important**  
**Not at all important**  
**Do not know**

i. Having healthcare professionals visit you at your home

| <b>African<br/>Americans N<br/>(%)</b> | <b>Non-African<br/>Americans N<br/>(%)</b> |
|----------------------------------------|--------------------------------------------|
| 95 (49.5)                              | 9 (36.0)                                   |
| 58 (30.2)                              | 9 (36.0)                                   |
| 6 (3.1)                                | 2 (8.0)                                    |
| 9 (4.7)                                | 2 (8.0)                                    |
| 22 (11.5)                              | 3 (12.0)                                   |
| 2 (1.0)                                | 0 (0.0)                                    |

**Very important**  
**Somewhat important**  
**Neither important nor unimportant**  
**Not very important**  
**Not at all important**  
**Do not know**

j. Understanding your treatment choices

| African Americans N (%) | Non-African Americans N (%) |                                   |
|-------------------------|-----------------------------|-----------------------------------|
| 168 (87.5)              | 25 (100.0)                  | Very important                    |
| 22 (11.5)               | 0 (0.0)                     | Somewhat important                |
| 0 (0.0)                 | 0 (0.0)                     | Neither important nor unimportant |
| 1 (0.52)                | 0 (0.0)                     | Not very important                |
| 1 (0.52)                | 0 (0.0)                     | Not at all important              |
| 0 (0.0)                 | 0 (0.0)                     | Do not know                       |

19. How important are each of the following to you when you think about dying?

a. Being physically comfortable

| African Americans N (%) | Non-African Americans N (%) |                                   |
|-------------------------|-----------------------------|-----------------------------------|
| 154 (80.2)              | 22 (88.0)                   | Very important                    |
| 32 (16.7)               | 2 (8.0)                     | Somewhat important                |
| 0 (0.0)                 | 0 (0.0)                     | Neither important nor unimportant |
| 1 (0.52)                | 0 (20.0)                    | Not very important                |
| 2 (1.0)                 | 1 (4.0)                     | Not at all important              |
| 3 (1.6)                 | 0 (0.0)                     | Do not know                       |

b. Being free from pain

| African Americans N (%) | Non-African Americans N (%) |                                   |
|-------------------------|-----------------------------|-----------------------------------|
| 165 (85.9)              | 21 (84.0)                   | Very important                    |
| 22 (11.5)               | 3 (12.0)                    | Somewhat important                |
| 2 (1.0)                 | 0 (0.0)                     | Neither important nor unimportant |
| 1 (0.52)                | 1 (4.0)                     | Not very important                |
| 0 (0.0)                 | 0 (0.0)                     | Not at all important              |
| 2 (1.0)                 | 0 (0.0)                     | Do not know                       |

c. Having said everything I want to say to people in my family

| African Americans N (%) | Non-African Americans N (%) |
|-------------------------|-----------------------------|
| 138 (71.9)              | 15 (60.0)                   |
| 39 (20.3)               | 8 (32.0)                    |
| 3 (1.6)                 | 1 (4.0)                     |
| 4 (2.1)                 | 0 (0.0)                     |
| 7 (3.7)                 | 1 (4.0)                     |
| 1 (0.52)                | 0 (0.0)                     |

Very important  
Somewhat important  
Neither important nor unimportant  
Not very important  
Not at all important  
Do not know

d. Being at peace spiritually

| African Americans N (%) | Non-African Americans N (%) |
|-------------------------|-----------------------------|
| 172 (89.6)              | 19 (76.0)                   |
| 15 (7.8)                | 3 (12.0)                    |
| 2 (1.0)                 | 1 (4.0)                     |
| 1 (0.52)                | 0 (0.0)                     |
| 1 (0.52)                | 2 (8.0)                     |
| 1 (0.52)                | 0 (0.0)                     |

Very important  
Somewhat important  
Neither important nor unimportant  
Not very important  
Not at all important  
Do not know

e. Not being a burden to loved ones

| African Americans N (%) | Non-African Americans N (%) |
|-------------------------|-----------------------------|
| 162 (84.4)              | 20 (80.0)                   |
| 25 (13.0)               | 4 (16.0)                    |
| 1 (0.52)                | 1 (4.0)                     |
| 1 (0.52)                | 0 (0.0)                     |
| 3 (1.6)                 | 0 (0.0)                     |
| 0 (0.0)                 | 0 (0.0)                     |

Very important  
Somewhat important  
Neither important nor unimportant  
Not very important  
Not at all important  
Do not know

f. Knowing how to say goodbye

| African Americans N (%) | Non-African Americans N (%) |
|-------------------------|-----------------------------|
| 137 (71.4)              | 17 (68.0)                   |
| 37 (19.3)               | 6 (24.0)                    |
| 3 (1.6)                 | 1 (4.0)                     |
| 5 (2.6)                 | 1 (4.0)                     |
| 5 (2.6)                 | 0 (0.0)                     |
| 5 (2.6)                 | 0 (0.0)                     |

Very important  
Somewhat important  
Neither important nor unimportant  
Not very important  
Not at all important  
Do not know

g. Having a sense of your own worth or value

| <b>African Americans N (%)</b> | <b>Non-African Americans N (%)</b> |                                          |
|--------------------------------|------------------------------------|------------------------------------------|
| 147 (76.6)                     | 19 (76.0)                          | <b>Very important</b>                    |
| 31 (16.2)                      | 6 (24.0)                           | <b>Somewhat important</b>                |
| 3 (1.6)                        | 0 (0.0)                            | <b>Neither important nor unimportant</b> |
| 2 (1.0)                        | 0 (0.0)                            | <b>Not very important</b>                |
| 7 (3.7)                        | 0 (0.0)                            | <b>Not at all important</b>              |
| 2 (1.0)                        | 0 (0.0)                            | <b>Do not know</b>                       |

h. Being off machines that extend life such as life support

| <b>African Americans N (%)</b> | <b>Non-African Americans N (%)</b> |                                          |
|--------------------------------|------------------------------------|------------------------------------------|
| 114 (59.4)                     | 17 (68.0)                          | <b>Very important</b>                    |
| 34 (17.7)                      | 2 (8.0)                            | <b>Somewhat important</b>                |
| 8 (4.2)                        | 2 (8.0)                            | <b>Neither important nor unimportant</b> |
| 5 (2.6)                        | 1 (4.0)                            | <b>Not very important</b>                |
| 13 (6.8)                       | 1 (4.0)                            | <b>Not at all important</b>              |
| 18 (9.4)                       | 2 (8.0)                            | <b>Do not know</b>                       |

i. Dying a natural death

| <b>African Americans N (%)</b> | <b>Non-African Americans N (%)</b> |                                          |
|--------------------------------|------------------------------------|------------------------------------------|
| 127 (66.2)                     | 16 (64.0)                          | <b>Very important</b>                    |
| 36 (18.8)                      | 7 (28.0)                           | <b>Somewhat important</b>                |
| 8 (4.2)                        | 1 (4.0)                            | <b>Neither important nor unimportant</b> |
| 4 (2.1)                        | 0 (0.0)                            | <b>Not very important</b>                |
| 7 (3.7)                        | 1 (4.0)                            | <b>Not at all important</b>              |
| 10 (5.2)                       | 0 (0.0)                            | <b>Do not know</b>                       |

20. If death were likely to happen in the next few weeks, and you could choose where to die, where would you MOST want to die? CHECK ONE answer only. \*Missing=1

| <b>African Americans N (%)</b> | <b>Non-African Americans N (%)</b> |                                       |
|--------------------------------|------------------------------------|---------------------------------------|
| 116 (60.7)                     | 19 (76.0)                          | <b>At home</b>                        |
| 1 (0.52)                       | 1 (4.0)                            | <b>In an assisted-living facility</b> |
| 37 (19.4)                      | 1 (4.0)                            | <b>In a hospital</b>                  |
| 1 (0.52)                       | 0 (0.0)                            | <b>In a nursing home</b>              |
| 4 (2.1)                        | 2 (8.0)                            | <b>In a residential hospice</b>       |
| 32 (16.8)                      | 2 (8.0)                            | <b>Do not know</b>                    |

21. Below are some statements related to pain near the end-of-life that have been expressed by people. How strongly do you agree or disagree with each statement? \*Missing=2

a. I am afraid my doctor may not believe I am in pain and treat my pain.

| <b>African Americans N (%)</b> | <b>Non-African Americans N (%)</b> |                                  |
|--------------------------------|------------------------------------|----------------------------------|
| 27 (14.2)                      | 3 (12.0)                           | <b>Strongly agree</b>            |
| 29 (15.3)                      | 5 (20.0)                           | <b>Agree</b>                     |
| 11 (5.8)                       | 3 (12.0)                           | <b>Neither agree or disagree</b> |
| 49 (25.8)                      | 5 (20.0)                           | <b>Disagree</b>                  |
| 61 (32.1)                      | 9 (36.0)                           | <b>Strongly disagree</b>         |
| 13 (6.8)                       | 0 (0.0)                            | <b>Do not know</b>               |

b. I would only take pain medicines when the pain is severe

| <b>African Americans N (%)</b> | <b>Non-African Americans N (%)</b> |                                  |
|--------------------------------|------------------------------------|----------------------------------|
| 77 (40.3)                      | 10 (40.0)                          | <b>Strongly agree</b>            |
| 79 (41.4)                      | 5 (20.0)                           | <b>Agree</b>                     |
| 4 (2.1)                        | 0 (0.0)                            | <b>Neither agree or disagree</b> |
| 15 (7.9)                       | 3 (12.0)                           | <b>Disagree</b>                  |
| 11 (5.8)                       | 6 (24.0)                           | <b>Strongly disagree</b>         |
| 5 (2.6)                        | 1 (4.0)                            | <b>Do not know</b>               |

c. I am afraid I will become addicted to pain medicines over time



| <b>African<br/>Americans N<br/>(%)</b> | <b>Non-African<br/>Americans N<br/>(%)</b> |                                  |
|----------------------------------------|--------------------------------------------|----------------------------------|
| 29 (15.1)                              | 3 (12.0)                                   | <b>Strongly agree</b>            |
| 30 (15.6)                              | 2 (8.0)                                    | <b>Agree</b>                     |
| 12 (6.3)                               | 4 (16.0)                                   | <b>Neither agree or disagree</b> |
| 55 (28.7)                              | 3 (12.0)                                   | <b>Disagree</b>                  |
| 60 (31.3)                              | 12 (48.0)                                  | <b>Strongly disagree</b>         |
| 6 (3.1)                                | 1 (4.0)                                    | <b>Do not know</b>               |

- d. I would take the lowest amount of medicine possible to save larger doses for when the pain is worse

| <b>African<br/>Americans N<br/>(%)</b> | <b>Non-African<br/>Americans N<br/>(%)</b> |                                  |
|----------------------------------------|--------------------------------------------|----------------------------------|
| 65 (33.9)                              | 8 (32.0)                                   | <b>Strongly agree</b>            |
| 64 (33.3)                              | 1 (4.0)                                    | <b>Agree</b>                     |
| 12 (6.3)                               | 4 (16.0)                                   | <b>Neither agree or disagree</b> |
| 28 (14.6)                              | 5 (20.0)                                   | <b>Disagree</b>                  |
| 16 (8.3)                               | 4 (16.0)                                   | <b>Strongly disagree</b>         |
| 7 (3.7)                                | 3 (12.0)                                   | <b>Do not know</b>               |

- e. I am afraid I would be given too much pain medicine

| <b>African<br/>Americans N<br/>(%)</b> | <b>Non-African<br/>Americans N<br/>(%)</b> |                                  |
|----------------------------------------|--------------------------------------------|----------------------------------|
| 14 (7.3)                               | 1 (4.0)                                    | <b>Strongly agree</b>            |
| 22 (11.5)                              | 1 (4.0)                                    | <b>Agree</b>                     |
| 20 (10.4)                              | 0 (0.0)                                    | <b>Neither agree or disagree</b> |
| 77 (40.1)                              | 9 (36.0)                                   | <b>Disagree</b>                  |
| 52 (27.1)                              | 11 (44.0)                                  | <b>Strongly disagree</b>         |
| 7 (3.7)                                | 3 (12.0)                                   | <b>Do not know</b>               |

22. Have you heard of hospice services?

| African Americans N (%) | Non-African Americans N (%) |                             |
|-------------------------|-----------------------------|-----------------------------|
| 168 (87.5)              | 24 (96.0)                   | Yes                         |
| 24 (12.5)               | 1 (4.0)                     | No (if no skip to Q23 & 24) |

23. How did you learn about hospice services? \*Missing= 3

| African Americans N (%) | Non-African Americans N (%) |                                                  |
|-------------------------|-----------------------------|--------------------------------------------------|
| 118 (71.5)              | 12 (50.0)                   | I know someone who used hospice services         |
| 5 (3.0)                 | 0 (0.0)                     | I have used hospice services myself              |
| 1 (0.6)                 | 2 (8.3)                     | I am/was a hospice volunteer                     |
| 14 (8.5)                | 3 (12.5)                    | I heard from a healthcare professional           |
| 13 (7.9)                | 5 (20.8)                    | I read literature/newspaper/TV/radio/other media |
| 12 (7.3)                | 2 (8.3)                     | I heard from others                              |
| 2 (1.2)                 | 0 (0.0)                     | No response                                      |

24. If you were dying, would you want hospice support? \*Missing=3

| African Americans N (%) | Non-African Americans N (%) |                      |
|-------------------------|-----------------------------|----------------------|
| 87 (53.1)               | 15 (60.0)                   | Yes                  |
| 29 (17.7)               | 1 (4.0)                     | No                   |
| 47 (28.7)               | 8 (32.0)                    | Do not know/not sure |
| 1 (0.61)                | 1 (4.0)                     | No response          |

**Spiritual Well-Being**

25. Do you consider yourself...? (If not religious/spiritual, skip Q26 and Q27)

| African Americans N (%) | Non-African Americans N (%) |                              |
|-------------------------|-----------------------------|------------------------------|
| 81 (42.2)               | 9 (37.5)                    | Very religious/spiritual     |
| 95 (49.5)               | 9 (37.5)                    | Somewhat religious/spiritual |
| 8 (4.2)                 | 2 (8.3)                     | Not very religious/spiritual |
| 5 (2.6)                 | 4 (16.7)                    | Not religious/spiritual      |
| 1 (0.52)                | 0 (0.0)                     | Do not know                  |
| 1 (1.0)                 | 0 (0.0)                     | No response                  |

26. How often do you attend religious or spiritual services?

| African Americans N (%) | Non-African Americans N (%) |             |
|-------------------------|-----------------------------|-------------|
| 41 (21.8)               | 0 (0.0)                     | Always      |
| 41 (21.8)               | 6 (27.3)                    | Very Often  |
| 53 (28.2)               | 7 (31.8)                    | Sometimes   |
| 37 (19.7)               | 7 (31.8)                    | Rarely      |
| 15 (8.0)                | 2 (9.1)                     | Never       |
| 1 (0.53)                | 0 (0.0)                     | Do not know |

27. How often does your religion or spirituality help you face your fears or do what you were afraid to do?

| African Americans N (%) | Non-African Americans N (%) |                     |
|-------------------------|-----------------------------|---------------------|
| 102 (54.6)              | 8 (36.4)                    | Everyday            |
| 23 (12.3)               | 2 (9.1)                     | A few times a week  |
| 26 (13.9)               | 5 (22.7)                    | A few times a month |
| 22 (11.8)               | 6 (27.3)                    | Rarely              |
| 9 (4.8)                 | 1 (4.6)                     | Never               |
| 5 (2.7)                 | 0 (0.0)                     | Do not know         |

28. How many times in your life have you been seen at an emergency room? \*Missing=5

| African Americans N (%) | Non-African Americans N (%) |   |
|-------------------------|-----------------------------|---|
| 5 (2.7)                 | 0 (0.0)                     | 0 |
| 4 (2.1)                 | 1 (4.0)                     | 1 |
| 16 (8.6)                | 2 (8.0)                     | 2 |
| 12 (6.4)                | 5 (20.0)                    | 3 |
| 17 (9.1)                | 5 (20.0)                    | 4 |
| 19 (10.2)               | 3 (12.0)                    | 5 |
| 13 (7.0)                | 0 (0.0)                     | 6 |

|           |         |            |
|-----------|---------|------------|
| 7 (3.7)   | 0 (0.0) | <b>7</b>   |
| 4 (2.1)   | 1 (4.0) | <b>8</b>   |
| 2 (1.1)   | 0 (0.0) | <b>9</b>   |
| 31 (16.6) | 1 (4.0) | <b>10</b>  |
| 2 (1.1)   | 2 (8.0) | <b>12</b>  |
| 3 (1.6)   | 2 (8.0) | <b>15</b>  |
| 23 (12.3) | 2 (8.0) | <b>20</b>  |
| 1 (0.53)  | 0 (0.0) | <b>24</b>  |
| 6 (3.2)   | 0 (0.0) | <b>30</b>  |
| 1 (0.53)  | 0 (0.0) | <b>40</b>  |
| 8 (4.3)   | 1 (4.0) | <b>50</b>  |
| 1 (0.53)  | 0 (0.0) | <b>60</b>  |
| 1 (0.53)  | 0 (0.0) | <b>65</b>  |
| 1 (0.53)  | 0 (0.0) | <b>70</b>  |
| 8 (4.3)   | 0 (0.0) | <b>100</b> |
| 1 (0.53)  | 0 (0.0) | <b>220</b> |
| 1 (0.53)  | 0 (0.0) | <b>999</b> |

29. How many times in your life have you ever been hospitalized? *Missing=4*

| <b>African<br/>Americans N<br/>(%)</b> | <b>Non-African<br/>Americans N<br/>(%)</b> |          |
|----------------------------------------|--------------------------------------------|----------|
| 9 (4.8)                                | 4 (16.0)                                   | <b>0</b> |
| 18 (9.6)                               | 1 (4.0)                                    | <b>1</b> |
| 29 (15.4)                              | 3 (12.0)                                   | <b>2</b> |
| 19 (10.1)                              | 5 (20.0)                                   | <b>3</b> |
| 25 (13.3)                              | 2 (8.0)                                    | <b>4</b> |
| 29 (15.4)                              | 6 (24.0)                                   | <b>5</b> |
| 11 (5.9)                               | 1 (4.0)                                    | <b>6</b> |

|          |         |           |
|----------|---------|-----------|
| 6 (3.2)  | 0 (0.0) | <b>7</b>  |
| 1 (0.53) | 1 (4.0) | <b>8</b>  |
| 2 (1.1)  | 0 (0.0) | <b>9</b>  |
| 14 (7.5) | 0 (0.0) | <b>10</b> |
| 5 (2.7)  | 0 (0.0) | <b>12</b> |
| 3 (1.6)  | 0 (0.0) | <b>15</b> |
| 6 (3.2)  | 1 (0.0) | <b>20</b> |
| 3 (1.6)  | 1 (0.0) | <b>25</b> |
| 3 (1.6)  | 0 (0.0) | <b>30</b> |
| 1 (0.53) | 0 (0.0) | <b>35</b> |
| 2 (1.1)  | 0 (0.0) | <b>40</b> |
| 2 (1.1)  | 0 (0.0) | <b>50</b> |
| 1 (0.53) | 0 (0.0) | <b>60</b> |

29a. How many nights have you spend in a hospital in the last year?

| <b>African<br/>Americans N<br/>(%)</b> | <b>Non-African<br/>Americans N<br/>(%)</b> |            |
|----------------------------------------|--------------------------------------------|------------|
| 122 (63.5)                             | 19 (76.0)                                  | <b>0</b>   |
| 8 (4.2)                                | 0 (0.0)                                    | <b>1</b>   |
| 15 (7.8)                               | 1 (4.0)                                    | <b>2</b>   |
| 11 (5.7)                               | 1 (4.0)                                    | <b>3</b>   |
| 9 (4.7)                                | 0 (0.0)                                    | <b>4</b>   |
| 4 (2.1)                                | 1 (4.0)                                    | <b>5</b>   |
| 3 (1.6)                                | 1 (4.0)                                    | <b>7</b>   |
| 1 (0.53)                               | 0 (0.0)                                    | <b>10</b>  |
| 2 (1.0)                                | 1 (4.0)                                    | <b>12</b>  |
| 3 (1.6)                                | 0 (0.0)                                    | <b>14</b>  |
| 1 (0.53)                               | 0 (0.0)                                    | <b>15</b>  |
| 1 (0.53)                               | 0 (0.0)                                    | <b>16</b>  |
| 2 (1.0)                                | 0 (0.0)                                    | <b>20</b>  |
| 2 (1.0)                                | 0 (0.0)                                    | <b>21</b>  |
| 1 (0.53)                               | 0 (0.0)                                    | <b>25</b>  |
| 3 (1.6)                                | 1 (4.0)                                    | <b>30</b>  |
| 2 (1.0)                                | 0 (0.0)                                    | <b>90</b>  |
| 1 (0.53)                               | 0 (0.0)                                    | <b>120</b> |
| 1 (0.53)                               | 0 (0.0)                                    | <b>180</b> |

29b. How many of these hospitalization were psychiatric hospitalizations? For example, behavior problems or depression.

| <b>African<br/>Americans N<br/>(%)</b> | <b>Non-African<br/>Americans N<br/>(%)</b> |           |
|----------------------------------------|--------------------------------------------|-----------|
| 159 (85.5)                             | 21 (87.5)                                  | <b>0</b>  |
| 17 (9.1)                               | 1 (4.2)                                    | <b>1</b>  |
| 3 (1.6)                                | 2 (8.3)                                    | <b>2</b>  |
| 2 (1.1)                                | 0 (0.0)                                    | <b>3</b>  |
| 1 (0.54)                               | 0 (0.0)                                    | <b>4</b>  |
| 1 (0.54)                               | 0 (0.0)                                    | <b>5</b>  |
| 1 (0.54)                               | 0 (0.0)                                    | <b>6</b>  |
| 1 (0.54)                               | 0 (0.0)                                    | <b>7</b>  |
| 1 (0.54)                               | 0 (0.0)                                    | <b>17</b> |

29c. How many nights have you spent psychiatrically hospitalized in the past year?

| <b>African<br/>Americans N<br/>(%)</b> | <b>Non-African<br/>Americans N<br/>(%)</b> |           |
|----------------------------------------|--------------------------------------------|-----------|
| 172 (95.6)                             | 23 (95.8)                                  | <b>0</b>  |
| 2 (1.1)                                | 0 (0.0)                                    | <b>1</b>  |
| 1 (0.6)                                | 0 (0.0)                                    | <b>2</b>  |
| 1 (0.6)                                | 0 (0.0)                                    | <b>3</b>  |
| 1 (0.6)                                | 0 (0.0)                                    | <b>7</b>  |
| 1 (0.6)                                | 0 (0.0)                                    | <b>10</b> |
| 1 (0.6)                                | 1 (4.2)                                    | <b>14</b> |
| 1 (0.6)                                | 0 (0.0)                                    | <b>30</b> |

**Supplement Table 3. Significantly different survey responses by race (N=217)<sup>a</sup>**

| <b>Adult Palliative Care Survey Item<sup>b</sup></b>                                                                             | <b>African-American<br/>(n =192)<br/>N (%)</b> | <b>Non-African-<br/>American (n =25)<br/>N (%)</b> | <b>P<sup>c</sup></b> |
|----------------------------------------------------------------------------------------------------------------------------------|------------------------------------------------|----------------------------------------------------|----------------------|
| If someone could tell me when I would die,<br>I would want to know                                                               |                                                |                                                    | 0.0411               |
| Agree/Strongly Agree                                                                                                             | 73 (41.2)                                      | 5 (20.0)                                           |                      |
| Otherwise <sup>d</sup>                                                                                                           | 104 (58.8)                                     | 20 (80.0)                                          |                      |
| How important would family and friends<br>visiting be to you if you were dealing with<br>your own dying?                         |                                                |                                                    | 0.0171               |
| Somewhat important/Very Important                                                                                                | 160 (86.5)                                     | 17 (68.0)                                          |                      |
| Otherwise <sup>e</sup>                                                                                                           | 25 (13.5)                                      | 8 (32.0)                                           |                      |
| How important would being at peace<br>spiritually be to you if you were dealing<br>with your own dying?                          |                                                |                                                    | 0.0352               |
| Somewhat important/Very Important                                                                                                | 187 (97.1)                                     | 22 (88.0)                                          |                      |
| Otherwise <sup>e</sup>                                                                                                           | 4 (2.1)                                        | 3 (12.0)                                           |                      |
| How did you learn about hospice services?                                                                                        |                                                |                                                    | 0.0039               |
| I know someone who used hospice<br>services myself                                                                               | 118 (72.4)                                     | 12 (50.0)                                          |                      |
| I have used hospice services myself                                                                                              | 5 (3.1)                                        | 0 (0.0)                                            |                      |
| I am/was a hospice volunteer                                                                                                     | 1 (0.6)                                        | 2 (8.3)                                            |                      |
| I heard from a health care professional                                                                                          | 14 (8.6)                                       | 3 (12.5)                                           |                      |
| I read<br>literature/newspaper/TV/radio/other<br>media                                                                           | 13 (8.0)                                       | 5 (20.8)                                           |                      |
| I heard from others                                                                                                              | 12 (7.4)                                       | 2 (8.3)                                            |                      |
| If death were likely to happen in the next<br>few weeks, and you could choose where to<br>die, where would you MOST want to die? |                                                |                                                    | 0.0285               |
| At home                                                                                                                          | 116 (60.7)                                     | 19 (76.0)                                          |                      |
| In a hospital                                                                                                                    | 37 (19.4)                                      | 1 (4.0)                                            |                      |
| Other (assisted living/nursing<br>home/residential hospice)                                                                      | 6 (3.1)                                        | 3 (12.0)                                           |                      |
| Do not know                                                                                                                      | 32 (16.8)                                      | 2 (8.0)                                            |                      |

I would only take pain medicines when the pain is severe. 0.0113

|                      |            |           |
|----------------------|------------|-----------|
| Agree/Strongly Agree | 156 (83.9) | 15 (62.5) |
|----------------------|------------|-----------|

|                        |           |          |
|------------------------|-----------|----------|
| Otherwise <sup>d</sup> | 30 (16.1) | 9 (37.5) |
|------------------------|-----------|----------|

I would take the lowest amount of medicine possible to save larger doses for later when the pain is worse. 0.0067

|                      |            |          |
|----------------------|------------|----------|
| Agree/Strongly Agree | 129 (69.7) | 9 (40.9) |
|----------------------|------------|----------|

|                        |           |           |
|------------------------|-----------|-----------|
| Otherwise <sup>d</sup> | 56 (30.3) | 13 (59.1) |
|------------------------|-----------|-----------|

<sup>a</sup>6 participants who declined to give race were excluded.

<sup>b</sup>“Don’t know” was excluded from each question and changed the sample size for each question.

<sup>c</sup>All P values computed using Pearson chi-square test or Fisher Exact Test

<sup>d</sup>Otherwise: Neither agree nor disagree, Disagree, Strongly Disagree

<sup>e</sup>Otherwise: Neither important nor unimportant, Not very important, Not at all important



**Supplement Table 4. Significantly different survey responses by age (N=223)**

| <b>Adult Palliative Care Survey<sup>a</sup></b>                                                                     | <b>Young Adult<br/>22–39 years old<br/>(n = 44)<br/>N (%)</b> | <b>Adult<br/>40–60 years old<br/>(n = 128)<br/>N (%)</b> | <b>Elderly<br/>61–77 years old<br/>(n = 51)<br/>N (%)</b> | <b>P<sup>b</sup></b> |
|---------------------------------------------------------------------------------------------------------------------|---------------------------------------------------------------|----------------------------------------------------------|-----------------------------------------------------------|----------------------|
| How afraid if at all, are you of dying suddenly, such as an accident, or being killed?                              |                                                               |                                                          |                                                           | 0-0007               |
| Afraid                                                                                                              | 27 (61.3)                                                     | 50 (40.0)                                                | 11 (22.5)                                                 |                      |
| Otherwise <sup>c</sup>                                                                                              | 17 (38.6)                                                     | 75 (60.0)                                                | 38 (77.6)                                                 |                      |
| Dying is an important part of life.                                                                                 |                                                               |                                                          |                                                           | 0-0118               |
| Agree                                                                                                               | 32 (74.4)                                                     | 115 (92.0)                                               | 43 (91.5)                                                 |                      |
| Otherwise <sup>d</sup>                                                                                              | 11 (25.6)                                                     | 10 (8.0)                                                 | 4 (8.5)                                                   |                      |
| How important would family and friends visiting be to you if you were dealing with your own dying?                  |                                                               |                                                          |                                                           | 0-0332               |
| Important                                                                                                           | 42 (95.5)                                                     | 98 (76.7)                                                | 43 (87.8)                                                 |                      |
| Otherwise <sup>e</sup>                                                                                              | 2 (4.56)                                                      | 25 (20.3)                                                | 6 (12.3)                                                  |                      |
| How important would fulfilling personal goals/pleasures be to you if you were dealing with your own dying?          |                                                               |                                                          |                                                           | 0-0208               |
| Important                                                                                                           | 42 (95.5)                                                     | 113 (89.7)                                               | 37 (77.1)                                                 |                      |
| Otherwise <sup>e</sup>                                                                                              | 2 (4.6)                                                       | 13 (10.3)                                                | 11 (22.9)                                                 |                      |
| How important would reviewing your life history with your family be to you if you were dealing with your own dying? |                                                               |                                                          |                                                           | 0-0053               |
| Important                                                                                                           | 36 (81.8)                                                     | 90 (71.4)                                                | 26 (52.0)                                                 |                      |
| Otherwise <sup>e</sup>                                                                                              | 8 (18.2)                                                      | 36 (28.6)                                                | 24 (48.0)                                                 |                      |
| How often do you attend religious or spiritual services?                                                            |                                                               |                                                          |                                                           | 0-0426               |
| Always to sometimes                                                                                                 | 22 (55.0)                                                     | 91 (72.8)                                                | 39 (78.0)                                                 |                      |
| Rarely or never                                                                                                     | 18 (45.0)                                                     | 34 (27.2)                                                | 11 (22.0)                                                 |                      |

<sup>a</sup>“Don’t know” was excluded from each question and changed the sample size for each question.

<sup>b</sup>All P values were computed using Pearson chi-square test or Fisher Exact Test.

<sup>c</sup>Otherwise: Neither afraid nor not afraid, Not very afraid, Not at all afraid

<sup>d</sup>Otherwise: Neither agree nor disagree, Disagree, Strongly Disagree

<sup>e</sup>Otherwise: Neither important nor unimportant, Not very important, Not at all important

**Supplement Table 5. Significantly different survey responses by gender (N=219)<sup>a</sup>**

| <b>Adult Palliative Care Survey<sup>b</sup></b>                                                                                                           | <b>Females<br/>( n = 94)<br/>N (%)</b> | <b>Males<br/>( n = 125)<br/>N (%)</b> | <b>P<sup>c</sup></b> |
|-----------------------------------------------------------------------------------------------------------------------------------------------------------|----------------------------------------|---------------------------------------|----------------------|
| How afraid if at all, are you of dying suddenly, such as an accident, or being killed?                                                                    |                                        |                                       | 0.0076               |
| Afraid                                                                                                                                                    | 46 (50.0)                              | 39 (32.0)                             |                      |
| Otherwise <sup>d</sup>                                                                                                                                    | 46 (50.0)                              | 83 (68.0)                             |                      |
| If someone could tell me when I would die, I would want to know.                                                                                          |                                        |                                       | 0.0149               |
| Agree                                                                                                                                                     | 40 (47.6)                              | 37 (30.8)                             |                      |
| Otherwise <sup>e</sup>                                                                                                                                    | 44 (52.4)                              | 83 (69.2)                             |                      |
| How important would comfort from church services or persons such as a minister, priest, imam, or rabbi be to you if you were dealing with your own dying? |                                        |                                       | 0.0033               |
| Important                                                                                                                                                 | 79 (87.8)                              | 85 (70.8)                             |                      |
| Otherwise <sup>f</sup>                                                                                                                                    | 11 (12.2)                              | 35 (29.2)                             |                      |
| How important would planning your own funeral be to you if you were dealing with your own dying?                                                          |                                        |                                       | 0.0035               |
| Important                                                                                                                                                 | 81 (88.0)                              | 88 (71.5)                             |                      |
| Otherwise <sup>f</sup>                                                                                                                                    | 11 (12.0)                              | 35 (28.5)                             |                      |
| How important would reviewing your life history with your family be to you if you were dealing with your own dying?                                       |                                        |                                       | 0.005                |
| Important                                                                                                                                                 | 74 (79.6)                              | 76 (61.8)                             |                      |
| Otherwise <sup>f</sup>                                                                                                                                    | 19 (20.4)                              | 47 (38.2)                             |                      |
| How important are knowing how to say goodbye to you when you think about dying?                                                                           |                                        |                                       | 0.0445               |
| Important                                                                                                                                                 | 91 (96.8)                              | 108 (90.0)                            |                      |
| Otherwise <sup>f</sup>                                                                                                                                    | 3 (3.2)                                | 12 (10.0)                             |                      |

<sup>a</sup>4 participants who were transgender were removed due to the size is less than 5.

<sup>b</sup>“Don’t know” was excluded from each question and changed the sample size for each question.

<sup>c</sup>All P values were computed using Pearson chi-square test or Fisher Exact Test.

<sup>d</sup>Otherwise: Neither afraid nor not afraid, Not very afraid, Not at all afraid

<sup>e</sup>Otherwise: Neither agree nor disagree, Disagree, Strongly Disagree

<sup>f</sup>Otherwise: Neither important nor unimportant, Not very important, Not at all important

**Supplement Table 6. Significantly different survey responses by sexual orientation (N=223)**

| Adult Palliative Care Survey <sup>a</sup>                                                                                                                 | Non-Heterosexual<br>(n = 75)<br>n (%) | Heterosexual<br>(n = 148)<br>n (%) | P <sup>b</sup> |
|-----------------------------------------------------------------------------------------------------------------------------------------------------------|---------------------------------------|------------------------------------|----------------|
| How afraid if at all, are you of dying alone?                                                                                                             |                                       |                                    | 0.0397         |
| Afraid                                                                                                                                                    | 39 (53.4)                             | 55 (38.7)                          |                |
| Otherwise <sup>c</sup>                                                                                                                                    | 34 (46.6)                             | 87 (61.3)                          |                |
| How important would comfort from church services or persons such as a minister, priest, imam, or rabbi be to you if you were dealing with your own dying? |                                       |                                    | 0.002          |
| Important                                                                                                                                                 | 47 (66.2)                             | 121 (84.6)                         |                |
| Otherwise <sup>d</sup>                                                                                                                                    | 24 (33.8)                             | 22 (15.4)                          |                |
| I would only take pain medicines when the pain is severe.                                                                                                 |                                       |                                    | 0.0091         |
| Agree                                                                                                                                                     | 52 (70.3)                             | 121 (85.2)                         |                |
| Otherwise <sup>e</sup>                                                                                                                                    | 22 (29.7)                             | 21 (14.8)                          |                |
| Do you consider yourself religious/spiritual?                                                                                                             |                                       |                                    | 0.0093         |
| Religious/spiritual                                                                                                                                       | 62 (83.8)                             | 137 (94.5)                         |                |
| Not religious/not spiritual                                                                                                                               | 12 (16.2)                             | 8 (5.5)                            |                |
| How often do you attend religious or spiritual services?                                                                                                  |                                       |                                    | 0.0017         |
| Always to sometimes                                                                                                                                       | 41 (56.9)                             | 111 (77.6)                         |                |
| Rarely or never                                                                                                                                           | 31 (43.1)                             | 32 (22.4)                          |                |

<sup>a</sup>“Don’t know” was excluded from each question and changed the sample size for each question.

<sup>b</sup>All P values were computed using Pearson chi-square test.

<sup>c</sup>Otherwise: Neither afraid nor not afraid, Not very afraid, Not at all afraid

<sup>d</sup>Otherwise: Neither important nor unimportant, Not very important, Not at all important

<sup>e</sup>Otherwise: Neither agree nor disagree, Disagree, Strongly Disagree

**Supplement Table 7. Significantly different survey responses by education (N=223)**

| <b>Adult Palliative Care Survey<sup>a</sup></b>                                | <b>Some college or higher<br/>(n = 130)<br/>n (%)</b> | <b>High school or lower<br/>(n = 93)<br/>n (%)</b> | <b>P<sup>b</sup></b> |
|--------------------------------------------------------------------------------|-------------------------------------------------------|----------------------------------------------------|----------------------|
| How strongly do you agree or disagree that dying is an important part of life? |                                                       |                                                    | 0.0391               |
| Agree                                                                          | 117 (92.1)                                            | 73 (83.0)                                          |                      |
| Otherwise <sup>c</sup>                                                         | 10 (7.9)                                              | 15 (17.1)                                          |                      |
| I would only take pain medicines when the pain is severe.                      |                                                       |                                                    | 0.0238               |
| Agree                                                                          | 96 (75.0)                                             | 77 (87.5)                                          |                      |
| Otherwise <sup>c</sup>                                                         | 32 (25.0)                                             | 11 (12.5)                                          |                      |
| I am afraid I would be given too much pain medicine.                           |                                                       |                                                    | 0.0202               |
| Agree                                                                          | 16 (13.5)                                             | 24 (26.1)                                          |                      |
| Otherwise <sup>c</sup>                                                         | 103 (86.6)                                            | 68 (73.9)                                          |                      |

<sup>a</sup>“Don’t know” was excluded from each question and changed the sample size for each question.

<sup>b</sup>All P values were computed using Pearson chi-square test.

<sup>c</sup>Otherwise: Neither agree nor disagree, Disagree, Strongly Disagree

**Supplement Table 8. Significantly different survey responses by income (N=218)<sup>a</sup>**

| <b>Adult Palliative Care Survey<sup>b</sup></b>                                                                     | <b>Equal or below federal poverty line (n = 86) n (%)</b> | <b>Higher than federal poverty line (n = 87) n (%)</b> | <b>Declined to Report (n = 45) n (%)</b> | <b>P<sup>c</sup></b> |
|---------------------------------------------------------------------------------------------------------------------|-----------------------------------------------------------|--------------------------------------------------------|------------------------------------------|----------------------|
| How concerned are you that the family's money won't last.                                                           |                                                           |                                                        |                                          | 0.0045               |
| Concerned                                                                                                           | 31 (87.4)                                                 | 36 (42.9)                                              | 29 (67.4)                                |                      |
| Otherwise <sup>d</sup>                                                                                              | 52 (62.7)                                                 | 48 (57.1)                                              | 14 (32.6)                                |                      |
| How important would being able to stay in your own home be to you if you were dealing with your own dying?          |                                                           |                                                        |                                          | 0.0117               |
| Important                                                                                                           | 76 (92.7)                                                 | 66 (75.9)                                              | 33 (80.5)                                |                      |
| Otherwise <sup>e</sup>                                                                                              | 6 (7.3)                                                   | 21 (24.1)                                              | 8 (19.5)                                 |                      |
| How important would fulfilling personal goals/pleasures be to you if you were dealing with your own dying?          |                                                           |                                                        |                                          | 0.0066               |
| Important                                                                                                           | 70 (84.3)                                                 | 73 (84.9)                                              | 44 (100.0)                               |                      |
| Otherwise <sup>e</sup>                                                                                              | 13 (15.7)                                                 | 13 (15.1)                                              | 0 (0.0)                                  |                      |
| How important would reviewing your life history with your family be to you if you were dealing with your own dying? |                                                           |                                                        |                                          | 0.0249               |
| Every day to a few times a month                                                                                    | 63 (73.3)                                                 | 50 (58.1)                                              | 34 (79.1)                                |                      |
| Rarely or never                                                                                                     | 23 (26.7)                                                 | 36 (41.9)                                              | 9 (20.9)                                 |                      |
| I am afraid I would be given too much pain medicine.                                                                |                                                           |                                                        |                                          | 0.0249               |
| Agree                                                                                                               | 15 (17.9)                                                 | 11 (13.8)                                              | 14 (33.3)                                |                      |
| Otherwise <sup>f</sup>                                                                                              | 69 (82.1)                                                 | 69 (86.3)                                              | 28 (66.7)                                |                      |

<sup>a</sup> Income had 5 missing data.

<sup>b</sup> "Don't know" was excluded from each question and changed the sample size for each question.

<sup>c</sup> All P values were computed using Pearson chi-square test or Fisher Exact Test.

<sup>d</sup> Otherwise: Neither concerned nor unconcerned, Not concerned, Not at all concerned

<sup>e</sup> Otherwise: Neither important nor unimportant, Not very important, Not at all important

<sup>f</sup> Otherwise: Neither agree nor disagree, Disagree, Strongly Disagree
